# Supplementary material for: Synthesis and reactivity of rhodium and iridium alkene, alkyl and silyl complexes supported by a phenyl-substituted PNP pincer ligand
Source: Royal Society of Chemistry journal article supplement (doi:10.1039/b925856f), 2010-01-01
Supplement: b925856f.pdf [file b925856f.pdf]

## Electronic Supplementary Information

### Synthesis and Reactivity of Rhodium and Iridium Alkene, Alkyl and Silyl Complexes Supported by Phenyl-substituted PNP Pincer Ligand

*Elisa Calimano and T. Don Tilley\**

Department of Chemistry, University of California, Berkeley, California 94720

Email: [tdtilley@berkeley.edu](mailto:tdtilley@berkeley.edu)

#### Contents:

|               |                                     |
|---------------|-------------------------------------|
| Page S2 – 15  | Crystallographic data for <b>2</b>  |
| Page S16 – 25 | Crystallographic data for <b>3</b>  |
| Page S26 – 36 | Crystallographic data for <b>16</b> |
| Page S37 – 47 | Crystallographic data for <b>18</b> |

For **2**: Crystals were grown from vapor diffusion heptane into a concentrated solution of **2** in *ortho*-dichlorobenzene at ambient temperature. The unit cell contained two molecules of *ortho*-dichlorobenzene, one of the molecules exhibited rotational disorder treated by utilizing a free variable for the occupancy and employing the SAME command.

Table S1. Crystal data and structure refinement for compound **2**.

|                                   |                                                                     |                 |
|-----------------------------------|---------------------------------------------------------------------|-----------------|
| Empirical formula                 | C <sub>58</sub> H <sub>49</sub> Cl <sub>5</sub> Ir N P <sub>2</sub> |                 |
| Formula weight                    | 1191.37                                                             |                 |
| Temperature                       | 100(2) K                                                            |                 |
| Wavelength                        | 1.54184 Å                                                           |                 |
| Crystal system                    | Triclinic                                                           |                 |
| Space group                       | P -1                                                                |                 |
| Unit cell dimensions              | a = 9.6344(14) Å                                                    | α = 88.097(4)°. |
|                                   | b = 10.6886(15) Å                                                   | β = 81.884(4)°. |
|                                   | c = 24.996(4) Å                                                     | γ = 80.357(4)°. |
| Volume                            | 2512.1(6) Å <sup>3</sup>                                            |                 |
| Z                                 | 2                                                                   |                 |
| Density (calculated)              | 1.575 g/cm <sup>3</sup>                                             |                 |
| Absorption coefficient            | 8.501 mm <sup>-1</sup>                                              |                 |
| F(000)                            | 1192                                                                |                 |
| Crystal size                      | 0.10 x 0.07 x 0.03 mm <sup>3</sup>                                  |                 |
| Theta range for data collection   | 4.20 to 68.57°.                                                     |                 |
| Index ranges                      | -11 ≤ h ≤ 11, -12 ≤ k ≤ 12, -30 ≤ l ≤ 29                            |                 |
| Reflections collected             | 37973                                                               |                 |
| Independent reflections           | 8775 [R(int) = 0.0201]                                              |                 |
| Completeness to theta = 68.57°    | 94.7 %                                                              |                 |
| Absorption correction             | Semi-empirical from equivalents                                     |                 |
| Max. and min. transmission        | 0.7845 and 0.4836                                                   |                 |
| Refinement method                 | Full-matrix least-squares on F <sup>2</sup>                         |                 |
| Data / restraints / parameters    | 8775 / 54 / 642                                                     |                 |
| Goodness-of-fit on F <sup>2</sup> | 1.339                                                               |                 |
| Final R indices [I > 2σ(I)]       | R1 = 0.0349, wR2 = 0.1231                                           |                 |
| R indices (all data)              | R1 = 0.0361, wR2 = 0.1310                                           |                 |
| Largest diff. peak and hole       | 1.962 and -1.426 e. Å <sup>-3</sup>                                 |                 |

Table S2. Atomic coordinates ( $\times 10^4$ ) and equivalent isotropic displacement parameters ( $\text{\AA}^2 \times 10^3$ ) for **2**.  $U(\text{eq})$  is defined as one third of the trace of the orthogonalized  $U^{ij}$  tensor.

|       | x        | y        | z       | U(eq) |
|-------|----------|----------|---------|-------|
| Ir(1) | 1320(1)  | 2444(1)  | 2682(1) | 18(1) |
| P(1)  | 565(1)   | 2054(1)  | 1864(1) | 18(1) |
| P(2)  | 1372(1)  | 612(1)   | 3195(1) | 20(1) |
| N(1)  | 3330(3)  | 1493(3)  | 2278(1) | 21(1) |
| Cl(1) | 5959(1)  | 2237(1)  | 2650(1) | 32(1) |
| C(1)  | 2131(5)  | 4189(4)  | 2504(2) | 33(1) |
| C(2)  | 2450(5)  | 3720(4)  | 3018(2) | 32(1) |
| C(3)  | 1667(6)  | 4435(5)  | 3526(2) | 43(1) |
| C(4)  | 352(5)   | 3935(4)  | 3759(2) | 34(1) |
| C(5)  | -277(4)  | 3256(4)  | 3348(2) | 26(1) |
| C(6)  | -629(5)  | 3801(4)  | 2856(2) | 29(1) |
| C(7)  | -469(6)  | 5179(5)  | 2693(2) | 35(1) |
| C(8)  | 1035(5)  | 5342(4)  | 2415(2) | 42(1) |
| C(9)  | -245(4)  | 716(3)   | 1679(2) | 20(1) |
| C(10) | 140(5)   | -458(4)  | 1918(2) | 27(1) |
| C(11) | -425(5)  | -1511(4) | 1789(2) | 32(1) |
| C(12) | -1362(4) | -1397(4) | 1417(2) | 30(1) |
| C(13) | -1740(4) | -226(4)  | 1160(2) | 28(1) |
| C(14) | -1190(4) | 811(4)   | 1296(2) | 25(1) |
| C(15) | -450(4)  | 3403(3)  | 1546(2) | 19(1) |
| C(16) | 179(4)   | 4290(4)  | 1218(2) | 25(1) |
| C(17) | -674(5)  | 5339(4)  | 1018(2) | 28(1) |
| C(18) | -2142(5) | 5508(4)  | 1148(2) | 28(1) |
| C(19) | -2765(4) | 4655(4)  | 1489(2) | 28(1) |
| C(20) | -1929(4) | 3609(4)  | 1688(2) | 24(1) |
| C(21) | 3492(4)  | 1664(3)  | 1687(2) | 21(1) |
| C(22) | 2276(4)  | 1778(3)  | 1434(2) | 19(1) |
| C(23) | 2414(4)  | 1802(4)  | 868(2)  | 23(1) |
| C(24) | 3742(4)  | 1777(4)  | 558(2)  | 25(1) |
| C(25) | 4901(4)  | 1789(4)  | 828(2)  | 28(1) |
| C(26) | 4795(4)  | 1720(4)  | 1387(2) | 23(1) |

|        |          |          |          |       |
|--------|----------|----------|----------|-------|
| C(27)  | 3883(5)  | 1831(4)  | -58(2)   | 33(1) |
| C(28)  | 3708(4)  | 124(4)   | 2418(2)  | 20(1) |
| C(29)  | 2850(4)  | -434(4)  | 2822(2)  | 23(1) |
| C(30)  | 3236(4)  | -1711(4) | 2955(2)  | 25(1) |
| C(31)  | 4468(4)  | -2458(4) | 2700(2)  | 25(1) |
| C(32)  | 5327(4)  | -1851(4) | 2316(2)  | 26(1) |
| C(33)  | 4967(4)  | -602(4)  | 2170(2)  | 23(1) |
| C(34)  | 4848(5)  | -3839(4) | 2840(2)  | 33(1) |
| C(35)  | 1937(5)  | 661(4)   | 3859(2)  | 26(1) |
| C(36)  | 3371(5)  | 589(5)   | 3913(2)  | 33(1) |
| C(37)  | 3768(5)  | 691(5)   | 4420(2)  | 38(1) |
| C(38)  | 2775(5)  | 903(4)   | 4872(2)  | 34(1) |
| C(39)  | 1345(5)  | 1002(4)  | 4821(2)  | 32(1) |
| C(40)  | 931(5)   | 880(4)   | 4319(2)  | 28(1) |
| C(41)  | -105(4)  | -278(4)  | 3343(2)  | 23(1) |
| C(42)  | -27(4)   | -1358(4) | 3683(2)  | 25(1) |
| C(43)  | -1152(5) | -2029(4) | 3769(2)  | 32(1) |
| C(44)  | -2373(5) | -1619(5) | 3541(2)  | 35(1) |
| C(45)  | -2472(5) | -551(4)  | 3215(2)  | 33(1) |
| C(46)  | -1347(4) | 126(4)   | 3119(2)  | 25(1) |
| Cl(2)  | 3033(2)  | 3942(1)  | 5025(1)  | 48(1) |
| Cl(3)  | 2350(2)  | 6693(2)  | 4523(1)  | 70(1) |
| C(47)  | 3265(5)  | 5268(4)  | 5358(2)  | 35(1) |
| C(48)  | 2933(5)  | 6476(5)  | 5151(2)  | 40(1) |
| C(49)  | 3092(6)  | 7528(5)  | 5430(2)  | 43(1) |
| C(50)  | 3587(5)  | 7347(5)  | 5928(2)  | 39(1) |
| C(51)  | 3923(5)  | 6163(5)  | 6137(2)  | 39(1) |
| C(52)  | 3762(5)  | 5114(5)  | 5857(2)  | 40(1) |
| Cl(4A) | 5831(2)  | 4999(1)  | 9210(1)  | 38(1) |
| Cl(5A) | 6436(2)  | 2269(1)  | 8680(1)  | 37(1) |
| C(53A) | 6933(10) | 3754(5)  | 9469(3)  | 27(2) |
| C(54A) | 7225(5)  | 2576(5)  | 9228(2)  | 24(1) |
| C(55A) | 8148(5)  | 1596(5)  | 9438(2)  | 28(1) |
| C(56A) | 8777(8)  | 1845(7)  | 9900(3)  | 25(2) |
| C(57A) | 8494(5)  | 3027(5)  | 10123(2) | 26(1) |
| C(58A) | 7592(5)  | 3976(5)  | 9908(2)  | 25(1) |

|        |          |          |          |         |
|--------|----------|----------|----------|---------|
| Cl(4B) | 7185(14) | 4708(13) | 10000(5) | 89(3)   |
| Cl(5B) | 8840(30) | 1780(20) | 9947(10) | 124(9)  |
| C(53B) | 7270(40) | 3740(20) | 9447(11) | 31(12)  |
| C(54B) | 7790(30) | 2460(20) | 9468(10) | 62(8)   |
| C(55B) | 7750(60) | 1690(30) | 9034(15) | 118(19) |
| C(56B) | 7190(70) | 2330(40) | 8586(14) | 130(20) |
| C(57B) | 6270(30) | 3450(20) | 8652(9)  | 45(6)   |
| C(58B) | 6400(30) | 4240(20) | 9055(9)  | 47(6)   |

---

Table S3. Bond lengths [Å] and angles [°] for **2**.

|            |           |              |          |
|------------|-----------|--------------|----------|
| Ir(1)-C(2) | 2.141(4)  | C(8)-H(8A)   | 0.9900   |
| Ir(1)-C(1) | 2.149(4)  | C(8)-H(8B)   | 0.9900   |
| Ir(1)-N(1) | 2.159(3)  | C(9)-C(10)   | 1.388(5) |
| Ir(1)-C(6) | 2.172(4)  | C(9)-C(14)   | 1.400(5) |
| Ir(1)-C(5) | 2.196(4)  | C(10)-C(11)  | 1.395(6) |
| Ir(1)-P(2) | 2.3027(9) | C(10)-H(10A) | 0.9500   |
| Ir(1)-P(1) | 2.3378(9) | C(11)-C(12)  | 1.375(7) |
| P(1)-C(22) | 1.821(4)  | C(11)-H(11A) | 0.9500   |
| P(1)-C(15) | 1.827(4)  | C(12)-C(13)  | 1.404(6) |
| P(1)-C(9)  | 1.840(4)  | C(12)-H(12A) | 0.9500   |
| P(2)-C(29) | 1.818(4)  | C(13)-C(14)  | 1.377(6) |
| P(2)-C(35) | 1.823(4)  | C(13)-H(13A) | 0.9500   |
| P(2)-C(41) | 1.829(4)  | C(14)-H(14A) | 0.9500   |
| N(1)-C(21) | 1.472(5)  | C(15)-C(16)  | 1.391(5) |
| N(1)-C(28) | 1.490(5)  | C(15)-C(20)  | 1.401(5) |
| N(1)-H(1)  | 0.90(6)   | C(16)-C(17)  | 1.398(6) |
| C(1)-C(2)  | 1.419(7)  | C(16)-H(16A) | 0.9500   |
| C(1)-C(8)  | 1.515(6)  | C(17)-C(18)  | 1.389(6) |
| C(1)-H(1A) | 1.0000    | C(17)-H(17A) | 0.9500   |
| C(2)-C(3)  | 1.538(6)  | C(18)-C(19)  | 1.379(6) |
| C(2)-H(2A) | 1.0000    | C(18)-H(18A) | 0.9500   |
| C(3)-C(4)  | 1.492(7)  | C(19)-C(20)  | 1.386(6) |
| C(3)-H(3A) | 0.9900    | C(19)-H(19A) | 0.9500   |
| C(3)-H(3B) | 0.9900    | C(20)-H(20A) | 0.9500   |
| C(4)-C(5)  | 1.523(6)  | C(21)-C(26)  | 1.377(6) |
| C(4)-H(4A) | 0.9900    | C(21)-C(22)  | 1.393(5) |
| C(4)-H(4B) | 0.9900    | C(22)-C(23)  | 1.403(5) |
| C(5)-C(6)  | 1.404(6)  | C(23)-C(24)  | 1.395(6) |
| C(5)-H(5A) | 1.0000    | C(23)-H(23A) | 0.9500   |
| C(6)-C(7)  | 1.541(6)  | C(24)-C(25)  | 1.386(6) |
| C(6)-H(6A) | 1.0000    | C(24)-C(27)  | 1.526(5) |
| C(7)-C(8)  | 1.551(7)  | C(25)-C(26)  | 1.388(6) |
| C(7)-H(7A) | 0.9900    | C(25)-H(25A) | 0.9500   |
| C(7)-H(7B) | 0.9900    | C(26)-H(26A) | 0.9500   |

|              |          |                 |           |
|--------------|----------|-----------------|-----------|
| C(27)-H(27A) | 0.9800   | C(45)-H(45A)    | 0.9500    |
| C(27)-H(27B) | 0.9800   | C(46)-H(46A)    | 0.9500    |
| C(27)-H(27C) | 0.9800   | Cl(2)-C(47)     | 1.728(5)  |
| C(28)-C(29)  | 1.396(6) | Cl(3)-C(48)     | 1.738(5)  |
| C(28)-C(33)  | 1.401(6) | C(47)-C(48)     | 1.378(6)  |
| C(29)-C(30)  | 1.395(6) | C(47)-C(52)     | 1.394(6)  |
| C(30)-C(31)  | 1.398(6) | C(48)-C(49)     | 1.382(7)  |
| C(30)-H(30A) | 0.9500   | C(49)-C(50)     | 1.392(7)  |
| C(31)-C(32)  | 1.394(6) | C(49)-H(49A)    | 0.9500    |
| C(31)-C(34)  | 1.502(5) | C(50)-C(51)     | 1.358(7)  |
| C(32)-C(33)  | 1.373(6) | C(50)-H(50A)    | 0.9500    |
| C(32)-H(32A) | 0.9500   | C(51)-C(52)     | 1.384(7)  |
| C(33)-H(33A) | 0.9500   | C(51)-H(51A)    | 0.9500    |
| C(34)-H(34A) | 0.9800   | C(52)-H(52A)    | 0.9500    |
| C(34)-H(34B) | 0.9800   | Cl(4A)-C(53A)   | 1.726(7)  |
| C(34)-H(34C) | 0.9800   | Cl(5A)-C(54A)   | 1.724(5)  |
| C(35)-C(40)  | 1.394(6) | C(53A)-C(54A)   | 1.383(7)  |
| C(35)-C(36)  | 1.396(6) | C(53A)-C(58A)   | 1.389(8)  |
| C(36)-C(37)  | 1.388(6) | C(54A)-C(55A)   | 1.394(7)  |
| C(36)-H(36A) | 0.9500   | C(55A)-C(56A)   | 1.430(8)  |
| C(37)-C(38)  | 1.372(7) | C(56A)-C(57A)   | 1.367(9)  |
| C(37)-H(37A) | 0.9500   | C(57A)-C(58A)   | 1.369(7)  |
| C(38)-C(39)  | 1.387(7) | Cl(4B)-C(53B)   | 1.735(16) |
| C(38)-H(38A) | 0.9500   | Cl(5B)-C(54B)   | 1.740(15) |
| C(39)-C(40)  | 1.386(6) | C(53B)-C(54B)   | 1.379(15) |
| C(39)-H(39A) | 0.9500   | C(53B)-C(58B)   | 1.413(16) |
| C(40)-H(40A) | 0.9500   | C(54B)-C(55B)   | 1.395(16) |
| C(41)-C(46)  | 1.390(6) | C(55B)-C(56B)   | 1.413(17) |
| C(41)-C(42)  | 1.409(6) | C(56B)-C(57B)   | 1.366(18) |
| C(42)-C(43)  | 1.385(6) | C(57B)-C(58B)   | 1.374(16) |
| C(42)-H(42A) | 0.9500   |                 |           |
| C(43)-C(44)  | 1.378(7) | C(2)-Ir(1)-C(1) | 38.62(18) |
| C(43)-H(43A) | 0.9500   | C(2)-Ir(1)-N(1) | 88.43(15) |
| C(44)-C(45)  | 1.378(7) | C(1)-Ir(1)-N(1) | 86.86(16) |
| C(44)-H(44A) | 0.9500   | C(2)-Ir(1)-C(6) | 89.50(17) |
| C(45)-C(46)  | 1.390(6) | C(1)-Ir(1)-C(6) | 79.90(18) |

|                  |            |                  |          |
|------------------|------------|------------------|----------|
| N(1)-Ir(1)-C(6)  | 161.15(17) | C(8)-C(1)-Ir(1)  | 115.7(3) |
| C(2)-Ir(1)-C(5)  | 79.10(17)  | C(2)-C(1)-H(1A)  | 113.1    |
| C(1)-Ir(1)-C(5)  | 93.88(17)  | C(8)-C(1)-H(1A)  | 113.1    |
| N(1)-Ir(1)-C(5)  | 158.57(16) | Ir(1)-C(1)-H(1A) | 113.1    |
| C(6)-Ir(1)-C(5)  | 37.49(16)  | C(1)-C(2)-C(3)   | 118.7(4) |
| C(2)-Ir(1)-P(2)  | 109.91(13) | C(1)-C(2)-Ir(1)  | 71.0(2)  |
| C(1)-Ir(1)-P(2)  | 147.58(12) | C(3)-C(2)-Ir(1)  | 115.9(3) |
| N(1)-Ir(1)-P(2)  | 84.05(9)   | C(1)-C(2)-H(2A)  | 114.7    |
| C(6)-Ir(1)-P(2)  | 114.19(13) | C(3)-C(2)-H(2A)  | 114.7    |
| C(5)-Ir(1)-P(2)  | 83.94(11)  | Ir(1)-C(2)-H(2A) | 114.7    |
| C(2)-Ir(1)-P(1)  | 139.91(13) | C(4)-C(3)-C(2)   | 113.0(4) |
| C(1)-Ir(1)-P(1)  | 101.74(13) | C(4)-C(3)-H(3A)  | 109.0    |
| N(1)-Ir(1)-P(1)  | 82.04(9)   | C(2)-C(3)-H(3A)  | 109.0    |
| C(6)-Ir(1)-P(1)  | 87.55(12)  | C(4)-C(3)-H(3B)  | 109.0    |
| C(5)-Ir(1)-P(1)  | 118.59(12) | C(2)-C(3)-H(3B)  | 109.0    |
| P(2)-Ir(1)-P(1)  | 107.68(3)  | H(3A)-C(3)-H(3B) | 107.8    |
| C(22)-P(1)-C(15) | 104.22(17) | C(3)-C(4)-C(5)   | 113.5(4) |
| C(22)-P(1)-C(9)  | 101.32(16) | C(3)-C(4)-H(4A)  | 108.9    |
| C(15)-P(1)-C(9)  | 102.36(17) | C(5)-C(4)-H(4A)  | 108.9    |
| C(22)-P(1)-Ir(1) | 99.58(12)  | C(3)-C(4)-H(4B)  | 108.9    |
| C(15)-P(1)-Ir(1) | 116.46(12) | C(5)-C(4)-H(4B)  | 108.9    |
| C(9)-P(1)-Ir(1)  | 129.16(12) | H(4A)-C(4)-H(4B) | 107.7    |
| C(29)-P(2)-C(35) | 102.52(19) | C(6)-C(5)-C(4)   | 123.9(4) |
| C(29)-P(2)-C(41) | 107.36(19) | C(6)-C(5)-Ir(1)  | 70.3(2)  |
| C(35)-P(2)-C(41) | 101.52(18) | C(4)-C(5)-Ir(1)  | 112.8(3) |
| C(29)-P(2)-Ir(1) | 101.77(14) | C(6)-C(5)-H(5A)  | 114.1    |
| C(35)-P(2)-Ir(1) | 116.55(13) | C(4)-C(5)-H(5A)  | 114.1    |
| C(41)-P(2)-Ir(1) | 124.85(14) | Ir(1)-C(5)-H(5A) | 114.1    |
| C(21)-N(1)-C(28) | 110.0(3)   | C(5)-C(6)-C(7)   | 122.5(4) |
| C(21)-N(1)-Ir(1) | 113.4(2)   | C(5)-C(6)-Ir(1)  | 72.2(2)  |
| C(28)-N(1)-Ir(1) | 115.5(2)   | C(7)-C(6)-Ir(1)  | 114.0(3) |
| C(21)-N(1)-H(1)  | 101(3)     | C(5)-C(6)-H(6A)  | 113.8    |
| C(28)-N(1)-H(1)  | 123(3)     | C(7)-C(6)-H(6A)  | 113.8    |
| Ir(1)-N(1)-H(1)  | 93(3)      | Ir(1)-C(6)-H(6A) | 113.8    |
| C(2)-C(1)-C(8)   | 124.7(4)   | C(6)-C(7)-C(8)   | 114.5(4) |
| C(2)-C(1)-Ir(1)  | 70.4(2)    | C(6)-C(7)-H(7A)  | 108.6    |



|                    |          |                     |          |
|--------------------|----------|---------------------|----------|
| C(8)-C(7)-H(7A)    | 108.6    | C(16)-C(17)-H(17A)  | 119.8    |
| C(6)-C(7)-H(7B)    | 108.6    | C(19)-C(18)-C(17)   | 120.0(4) |
| C(8)-C(7)-H(7B)    | 108.6    | C(19)-C(18)-H(18A)  | 120.0    |
| H(7A)-C(7)-H(7B)   | 107.6    | C(17)-C(18)-H(18A)  | 120.0    |
| C(1)-C(8)-C(7)     | 111.5(4) | C(18)-C(19)-C(20)   | 120.1(4) |
| C(1)-C(8)-H(8A)    | 109.3    | C(18)-C(19)-H(19A)  | 120.0    |
| C(7)-C(8)-H(8A)    | 109.3    | C(20)-C(19)-H(19A)  | 120.0    |
| C(1)-C(8)-H(8B)    | 109.3    | C(19)-C(20)-C(15)   | 120.6(4) |
| C(7)-C(8)-H(8B)    | 109.3    | C(19)-C(20)-H(20A)  | 119.7    |
| H(8A)-C(8)-H(8B)   | 108.0    | C(15)-C(20)-H(20A)  | 119.7    |
| C(10)-C(9)-C(14)   | 118.4(3) | C(26)-C(21)-C(22)   | 120.3(4) |
| C(10)-C(9)-P(1)    | 118.1(3) | C(26)-C(21)-N(1)    | 121.8(4) |
| C(14)-C(9)-P(1)    | 123.5(3) | C(22)-C(21)-N(1)    | 117.9(3) |
| C(9)-C(10)-C(11)   | 120.7(4) | C(21)-C(22)-C(23)   | 119.2(3) |
| C(9)-C(10)-H(10A)  | 119.6    | C(21)-C(22)-P(1)    | 117.4(3) |
| C(11)-C(10)-H(10A) | 119.6    | C(23)-C(22)-P(1)    | 123.1(3) |
| C(12)-C(11)-C(10)  | 120.0(4) | C(24)-C(23)-C(22)   | 120.8(4) |
| C(12)-C(11)-H(11A) | 120.0    | C(24)-C(23)-H(23A)  | 119.6    |
| C(10)-C(11)-H(11A) | 120.0    | C(22)-C(23)-H(23A)  | 119.6    |
| C(11)-C(12)-C(13)  | 120.1(4) | C(25)-C(24)-C(23)   | 117.8(4) |
| C(11)-C(12)-H(12A) | 119.9    | C(25)-C(24)-C(27)   | 121.5(4) |
| C(13)-C(12)-H(12A) | 119.9    | C(23)-C(24)-C(27)   | 120.6(4) |
| C(14)-C(13)-C(12)  | 119.3(4) | C(24)-C(25)-C(26)   | 122.2(4) |
| C(14)-C(13)-H(13A) | 120.4    | C(24)-C(25)-H(25A)  | 118.9    |
| C(12)-C(13)-H(13A) | 120.4    | C(26)-C(25)-H(25A)  | 118.9    |
| C(13)-C(14)-C(9)   | 121.4(4) | C(21)-C(26)-C(25)   | 119.2(4) |
| C(13)-C(14)-H(14A) | 119.3    | C(21)-C(26)-H(26A)  | 120.4    |
| C(9)-C(14)-H(14A)  | 119.3    | C(25)-C(26)-H(26A)  | 120.4    |
| C(16)-C(15)-C(20)  | 119.2(3) | C(24)-C(27)-H(27A)  | 109.5    |
| C(16)-C(15)-P(1)   | 123.4(3) | C(24)-C(27)-H(27B)  | 109.5    |
| C(20)-C(15)-P(1)   | 117.2(3) | H(27A)-C(27)-H(27B) | 109.5    |
| C(15)-C(16)-C(17)  | 119.8(4) | C(24)-C(27)-H(27C)  | 109.5    |
| C(15)-C(16)-H(16A) | 120.1    | H(27A)-C(27)-H(27C) | 109.5    |
| C(17)-C(16)-H(16A) | 120.1    | H(27B)-C(27)-H(27C) | 109.5    |
| C(18)-C(17)-C(16)  | 120.3(4) | C(29)-C(28)-C(33)   | 119.0(4) |
| C(18)-C(17)-H(17A) | 119.8    | C(29)-C(28)-N(1)    | 120.3(4) |

|                     |          |                    |          |
|---------------------|----------|--------------------|----------|
| C(33)-C(28)-N(1)    | 120.6(3) | C(38)-C(39)-H(39A) | 119.9    |
| C(30)-C(29)-C(28)   | 119.4(4) | C(39)-C(40)-C(35)  | 120.8(4) |
| C(30)-C(29)-P(2)    | 123.5(3) | C(39)-C(40)-H(40A) | 119.6    |
| C(28)-C(29)-P(2)    | 116.8(3) | C(35)-C(40)-H(40A) | 119.6    |
| C(29)-C(30)-C(31)   | 122.2(4) | C(46)-C(41)-C(42)  | 118.7(4) |
| C(29)-C(30)-H(30A)  | 118.9    | C(46)-C(41)-P(2)   | 119.3(3) |
| C(31)-C(30)-H(30A)  | 118.9    | C(42)-C(41)-P(2)   | 121.9(3) |
| C(32)-C(31)-C(30)   | 116.6(4) | C(43)-C(42)-C(41)  | 119.9(4) |
| C(32)-C(31)-C(34)   | 122.0(4) | C(43)-C(42)-H(42A) | 120.0    |
| C(30)-C(31)-C(34)   | 121.4(4) | C(41)-C(42)-H(42A) | 120.0    |
| C(33)-C(32)-C(31)   | 122.6(4) | C(44)-C(43)-C(42)  | 120.5(4) |
| C(33)-C(32)-H(32A)  | 118.7    | C(44)-C(43)-H(43A) | 119.8    |
| C(31)-C(32)-H(32A)  | 118.7    | C(42)-C(43)-H(43A) | 119.8    |
| C(32)-C(33)-C(28)   | 120.1(4) | C(45)-C(44)-C(43)  | 120.1(4) |
| C(32)-C(33)-H(33A)  | 120.0    | C(45)-C(44)-H(44A) | 119.9    |
| C(28)-C(33)-H(33A)  | 120.0    | C(43)-C(44)-H(44A) | 119.9    |
| C(31)-C(34)-H(34A)  | 109.5    | C(44)-C(45)-C(46)  | 120.2(4) |
| C(31)-C(34)-H(34B)  | 109.5    | C(44)-C(45)-H(45A) | 119.9    |
| H(34A)-C(34)-H(34B) | 109.5    | C(46)-C(45)-H(45A) | 119.9    |
| C(31)-C(34)-H(34C)  | 109.5    | C(45)-C(46)-C(41)  | 120.4(4) |
| H(34A)-C(34)-H(34C) | 109.5    | C(45)-C(46)-H(46A) | 119.8    |
| H(34B)-C(34)-H(34C) | 109.5    | C(41)-C(46)-H(46A) | 119.8    |
| C(40)-C(35)-C(36)   | 118.6(4) | C(48)-C(47)-C(52)  | 119.0(4) |
| C(40)-C(35)-P(2)    | 120.3(3) | C(48)-C(47)-Cl(2)  | 122.0(4) |
| C(36)-C(35)-P(2)    | 120.9(3) | C(52)-C(47)-Cl(2)  | 118.9(4) |
| C(37)-C(36)-C(35)   | 119.8(4) | C(47)-C(48)-C(49)  | 121.1(4) |
| C(37)-C(36)-H(36A)  | 120.1    | C(47)-C(48)-Cl(3)  | 119.9(4) |
| C(35)-C(36)-H(36A)  | 120.1    | C(49)-C(48)-Cl(3)  | 118.9(4) |
| C(38)-C(37)-C(36)   | 121.4(4) | C(48)-C(49)-C(50)  | 118.6(4) |
| C(38)-C(37)-H(37A)  | 119.3    | C(48)-C(49)-H(49A) | 120.7    |
| C(36)-C(37)-H(37A)  | 119.3    | C(50)-C(49)-H(49A) | 120.7    |
| C(37)-C(38)-C(39)   | 119.2(4) | C(51)-C(50)-C(49)  | 121.1(5) |
| C(37)-C(38)-H(38A)  | 120.4    | C(51)-C(50)-H(50A) | 119.5    |
| C(39)-C(38)-H(38A)  | 120.4    | C(49)-C(50)-H(50A) | 119.5    |
| C(40)-C(39)-C(38)   | 120.2(4) | C(50)-C(51)-C(52)  | 120.0(5) |
| C(40)-C(39)-H(39A)  | 119.9    | C(50)-C(51)-H(51A) | 120.0    |

|                      |          |                      |           |
|----------------------|----------|----------------------|-----------|
| C(52)-C(51)-H(51A)   | 120.0    | C(56A)-C(57A)-C(58A) | 120.1(5)  |
| C(51)-C(52)-C(47)    | 120.0(4) | C(57A)-C(58A)-C(53A) | 120.9(5)  |
| C(51)-C(52)-H(52A)   | 120.0    | C(54B)-C(53B)-C(58B) | 120.7(16) |
| C(47)-C(52)-H(52A)   | 120.0    | C(54B)-C(53B)-Cl(4B) | 121.2(16) |
| C(54A)-C(53A)-C(58A) | 120.1(6) | C(58B)-C(53B)-Cl(4B) | 115.4(14) |
| C(54A)-C(53A)-Cl(4A) | 121.2(5) | C(53B)-C(54B)-C(55B) | 120.0(16) |
| C(58A)-C(53A)-Cl(4A) | 118.6(4) | C(53B)-C(54B)-Cl(5B) | 123.1(17) |
| C(53A)-C(54A)-C(55A) | 120.0(5) | C(55B)-C(54B)-Cl(5B) | 115.5(16) |
| C(53A)-C(54A)-Cl(5A) | 121.4(4) | C(54B)-C(55B)-C(56B) | 115(2)    |
| C(55A)-C(54A)-Cl(5A) | 118.6(4) | C(57B)-C(56B)-C(55B) | 121(2)    |
| C(54A)-C(55A)-C(56A) | 118.5(5) | C(56B)-C(57B)-C(58B) | 118(2)    |
| C(57A)-C(56A)-C(55A) | 120.3(5) | C(57B)-C(58B)-C(53B) | 117.5(16) |

---

Symmetry transformations used to generate equivalent atoms:

Table S4. Anisotropic displacement parameters ( $\text{\AA}^2 \times 10^3$ ) for **2**. The anisotropic displacement factor exponent takes the form:  $-2p^2[ h^2a^*U^{11} + \dots + 2 h k a^* b^* U^{12} ]$

|       | U <sup>11</sup> | U <sup>22</sup> | U <sup>33</sup> | U <sup>23</sup> | U <sup>13</sup> | U <sup>12</sup> |
|-------|-----------------|-----------------|-----------------|-----------------|-----------------|-----------------|
| Ir(1) | 19(1)           | 19(1)           | 17(1)           | -1(1)           | -3(1)           | -2(1)           |
| P(1)  | 18(1)           | 18(1)           | 17(1)           | -1(1)           | -3(1)           | -3(1)           |
| P(2)  | 20(1)           | 23(1)           | 17(1)           | 1(1)            | -2(1)           | -3(1)           |
| N(1)  | 20(2)           | 21(2)           | 22(2)           | 1(1)            | -6(1)           | -3(1)           |
| Cl(1) | 22(1)           | 41(1)           | 34(1)           | 2(1)            | -7(1)           | -10(1)          |
| C(1)  | 30(2)           | 23(2)           | 49(3)           | 0(2)            | -11(2)          | -11(2)          |
| C(2)  | 29(2)           | 35(2)           | 35(2)           | -10(2)          | -7(2)           | -9(2)           |
| C(3)  | 45(3)           | 48(3)           | 35(2)           | -24(2)          | -5(2)           | -3(2)           |
| C(4)  | 47(3)           | 30(2)           | 22(2)           | -7(2)           | -3(2)           | -3(2)           |
| C(5)  | 27(2)           | 25(2)           | 20(2)           | -9(2)           | 10(2)           | 4(2)            |
| C(6)  | 26(2)           | 27(2)           | 32(2)           | -6(2)           | -7(2)           | 5(2)            |
| C(7)  | 40(2)           | 28(2)           | 34(2)           | 1(2)            | -11(2)          | 4(2)            |
| C(8)  | 44(3)           | 25(2)           | 58(3)           | -1(2)           | -13(2)          | -9(2)           |
| C(9)  | 23(2)           | 19(2)           | 18(2)           | -4(1)           | 0(2)            | -4(1)           |
| C(10) | 34(2)           | 27(2)           | 21(2)           | -1(2)           | -4(2)           | -5(2)           |
| C(11) | 45(2)           | 22(2)           | 29(2)           | 3(2)            | -2(2)           | -5(2)           |
| C(12) | 30(2)           | 22(2)           | 39(2)           | -6(2)           | -2(2)           | -9(2)           |
| C(13) | 22(2)           | 27(2)           | 35(2)           | -5(2)           | -9(2)           | -4(2)           |
| C(14) | 27(2)           | 21(2)           | 27(2)           | 0(1)            | -8(2)           | -2(2)           |
| C(15) | 22(2)           | 15(2)           | 21(2)           | -5(1)           | -6(1)           | 4(1)            |
| C(16) | 26(2)           | 21(2)           | 27(2)           | -1(2)           | -4(2)           | -3(2)           |
| C(17) | 36(2)           | 21(2)           | 28(2)           | 1(2)            | -5(2)           | -7(2)           |
| C(18) | 35(2)           | 19(2)           | 31(2)           | -5(2)           | -14(2)          | 6(2)            |
| C(19) | 28(2)           | 24(2)           | 34(2)           | -7(2)           | -12(2)          | 1(2)            |
| C(20) | 23(2)           | 26(2)           | 24(2)           | -3(1)           | -2(2)           | -4(2)           |
| C(21) | 24(2)           | 22(2)           | 14(2)           | -1(1)           | 2(2)            | -1(1)           |
| C(22) | 20(2)           | 17(2)           | 19(2)           | -1(1)           | -3(1)           | -2(1)           |
| C(23) | 27(2)           | 21(2)           | 21(2)           | 0(1)            | -6(2)           | -3(1)           |
| C(24) | 29(2)           | 24(2)           | 21(2)           | 1(1)            | -1(2)           | 0(2)            |
| C(25) | 24(2)           | 28(2)           | 28(2)           | 7(2)            | 2(2)            | -1(2)           |
| C(26) | 20(2)           | 25(2)           | 22(2)           | 1(1)            | -2(2)           | 1(1)            |

|        |       |       |       |        |        |        |
|--------|-------|-------|-------|--------|--------|--------|
| C(27)  | 39(2) | 35(2) | 21(2) | 4(2)   | -1(2)  | -2(2)  |
| C(28)  | 21(2) | 21(2) | 20(2) | 2(1)   | -8(2)  | -3(1)  |
| C(29)  | 24(2) | 26(2) | 20(2) | 0(2)   | -6(2)  | -5(2)  |
| C(30)  | 25(2) | 27(2) | 21(2) | 4(2)   | -1(2)  | -4(2)  |
| C(31)  | 24(2) | 24(2) | 26(2) | 1(2)   | -7(2)  | -4(2)  |
| C(32)  | 24(2) | 26(2) | 27(2) | -1(2)  | -3(2)  | 0(2)   |
| C(33)  | 21(2) | 26(2) | 23(2) | 1(1)   | -4(2)  | -3(1)  |
| C(34)  | 32(2) | 25(2) | 37(2) | 4(2)   | -2(2)  | 3(2)   |
| C(35)  | 30(2) | 30(2) | 21(2) | 3(2)   | -7(2)  | -9(2)  |
| C(36)  | 28(2) | 47(3) | 25(2) | 1(2)   | -5(2)  | -9(2)  |
| C(37)  | 35(2) | 54(3) | 30(2) | 3(2)   | -11(2) | -17(2) |
| C(38)  | 51(3) | 30(2) | 28(2) | 3(2)   | -14(2) | -16(2) |
| C(39)  | 43(2) | 34(2) | 18(2) | 0(2)   | -4(2)  | -6(2)  |
| C(40)  | 28(2) | 34(2) | 20(2) | -4(2)  | 2(2)   | -5(2)  |
| C(41)  | 24(2) | 27(2) | 19(2) | -4(2)  | 3(2)   | -5(2)  |
| C(42)  | 24(2) | 30(2) | 18(2) | -4(2)  | 5(2)   | -1(2)  |
| C(43)  | 37(2) | 26(2) | 32(2) | -2(2)  | 1(2)   | -9(2)  |
| C(44)  | 33(2) | 38(2) | 37(2) | -7(2)  | -2(2)  | -15(2) |
| C(45)  | 25(2) | 39(2) | 36(2) | -7(2)  | -6(2)  | -7(2)  |
| C(46)  | 22(2) | 28(2) | 22(2) | -4(2)  | -1(2)  | -2(2)  |
| Cl(2)  | 60(1) | 39(1) | 47(1) | -7(1)  | -8(1)  | -15(1) |
| Cl(3)  | 99(1) | 60(1) | 53(1) | 2(1)   | -41(1) | 11(1)  |
| C(47)  | 32(2) | 36(2) | 35(2) | -3(2)  | -2(2)  | -3(2)  |
| C(48)  | 42(2) | 40(3) | 37(3) | -2(2)  | -10(2) | 0(2)   |
| C(49)  | 44(3) | 31(2) | 52(3) | 8(2)   | -7(2)  | -1(2)  |
| C(50)  | 41(2) | 40(2) | 33(2) | -8(2)  | 8(2)   | -9(2)  |
| C(51)  | 38(2) | 46(3) | 33(2) | -4(2)  | -3(2)  | -8(2)  |
| C(52)  | 42(2) | 42(3) | 32(2) | 5(2)   | -3(2)  | 2(2)   |
| Cl(4A) | 35(1) | 34(1) | 45(1) | -1(1)  | -20(1) | 7(1)   |
| Cl(5A) | 35(1) | 51(1) | 27(1) | -15(1) | -11(1) | -4(1)  |
| C(53A) | 14(3) | 32(4) | 34(4) | 3(2)   | -3(2)  | -3(2)  |
| C(54A) | 20(2) | 33(3) | 19(2) | -4(2)  | 1(2)   | -7(2)  |
| C(55A) | 26(2) | 34(3) | 20(2) | -14(2) | 5(2)   | 3(2)   |
| C(56A) | 26(3) | 22(3) | 22(3) | 8(2)   | -7(2)  | 9(2)   |
| C(57A) | 27(2) | 37(3) | 16(2) | 2(2)   | -3(2)  | -8(2)  |
| C(58A) | 21(2) | 20(2) | 32(3) | 1(2)   | -2(2)  | -1(2)  |

---

Table S5. Hydrogen bonds for **2** [Å and °].

| D-H...A           | d(D-H)  | d(H...A) | d(D...A) | <(DHA) |
|-------------------|---------|----------|----------|--------|
| N(1)-H(1)...Cl(1) | 0.90(6) | 2.31(5)  | 3.051(3) | 139(4) |

Symmetry transformations used to generate equivalent atoms:

For **3**: Crystals were grown from vapor diffusion pentane into a concentrated solution of **3** in dichloromethane at -30 °C.

Table S6. Crystal data and structure refinement for complex **3**.

|                                   |                                                     |                |
|-----------------------------------|-----------------------------------------------------|----------------|
| Empirical formula                 | C <sub>46</sub> H <sub>44</sub> Ir N P <sub>2</sub> |                |
| Formula weight                    | 864.96                                              |                |
| Temperature                       | 144(2) K                                            |                |
| Wavelength                        | 0.71073 Å                                           |                |
| Crystal system                    | Triclinic                                           |                |
| Space group                       | P -1                                                |                |
| Unit cell dimensions              | a = 10.230(2) Å                                     | α = 88.76(3)°. |
|                                   | b = 10.663(2) Å                                     | β = 89.08(3)°. |
|                                   | c = 17.091(3) Å                                     | γ = 73.16(3)°. |
| Volume                            | 1783.9(6) Å <sup>3</sup>                            |                |
| Z                                 | 2                                                   |                |
| Density (calculated)              | 1.610 g/cm <sup>3</sup>                             |                |
| Absorption coefficient            | 3.868 mm <sup>-1</sup>                              |                |
| F(000)                            | 868                                                 |                |
| Crystal size                      | 0.19 x 0.13 x 0.07 mm <sup>3</sup>                  |                |
| Crystal color/habit               | yellow prism                                        |                |
| Theta range for data collection   | 3.27 to 24.73°                                      |                |
| Index ranges                      | -12 ≤ h ≤ 11, -12 ≤ k ≤ 12, -9 ≤ l ≤ 20             |                |
| Reflections collected             | 9035                                                |                |
| Independent reflections           | 5839 [R(int) = 0.0185]                              |                |
| Completeness to theta = 24.73°    | 95.7 %                                              |                |
| Absorption correction             | Semi-empirical from equivalents                     |                |
| Max. and min. transmission        | 0.7735 and 0.5269                                   |                |
| Refinement method                 | Full-matrix least-squares on F <sup>2</sup>         |                |
| Data / restraints / parameters    | 5839 / 0 / 453                                      |                |
| Goodness-of-fit on F <sup>2</sup> | 1.156                                               |                |
| Final R indices [I > 2σ(I)]       | R1 = 0.0253, wR2 = 0.0581                           |                |
| R indices (all data)              | R1 = 0.0317, wR2 = 0.0598                           |                |
| Largest diff. peak and hole       | 2.135 and -0.614 e. Å <sup>-3</sup>                 |                |



Table S7. Atomic coordinates ( $\times 10^4$ ) and equivalent isotropic displacement parameters ( $\text{\AA}^2 \times 10^3$ ) for **3**.  $U(\text{eq})$  is defined as one third of the trace of the orthogonalized  $U^{ij}$  tensor.

|       | x        | y        | z       | U(eq) |
|-------|----------|----------|---------|-------|
| Ir(1) | -171(1)  | 2468(1)  | 3121(1) | 14(1) |
| P(1)  | -499(1)  | 3492(1)  | 1923(1) | 15(1) |
| P(2)  | 2111(1)  | 1156(1)  | 3194(1) | 14(1) |
| N(1)  | -228(3)  | 843(3)   | 2460(2) | 15(1) |
| C(1)  | -2059(4) | 2343(4)  | 3588(2) | 21(1) |
| C(2)  | -982(4)  | 1643(4)  | 4102(2) | 17(1) |
| C(3)  | -798(4)  | 2190(4)  | 4891(2) | 24(1) |
| C(4)  | 49(4)    | 3155(4)  | 4861(2) | 22(1) |
| C(5)  | 186(4)   | 3708(4)  | 4047(2) | 20(1) |
| C(6)  | -960(4)  | 4409(4)  | 3620(2) | 21(1) |
| C(7)  | -2413(4) | 4704(4)  | 3946(3) | 32(1) |
| C(8)  | -3081(4) | 3637(4)  | 3803(3) | 33(1) |
| C(9)  | 3453(4)  | 1053(4)  | 2449(2) | 16(1) |
| C(10) | 3054(4)  | 978(4)   | 1678(2) | 18(1) |
| C(11) | 3976(4)  | 889(4)   | 1064(2) | 22(1) |
| C(12) | 5287(4)  | 899(4)   | 1212(3) | 25(1) |
| C(13) | 5698(4)  | 975(4)   | 1973(3) | 26(1) |
| C(14) | 4790(4)  | 1042(4)  | 2592(2) | 22(1) |
| C(15) | 2933(4)  | 1154(4)  | 4133(2) | 17(1) |
| C(16) | 3549(4)  | 2128(4)  | 4279(2) | 20(1) |
| C(17) | 3999(4)  | 2280(4)  | 5024(2) | 24(1) |
| C(18) | 3795(4)  | 1479(4)  | 5634(2) | 25(1) |
| C(19) | 3184(4)  | 511(4)   | 5496(2) | 22(1) |
| C(20) | 2744(4)  | 349(4)   | 4749(2) | 19(1) |
| C(21) | 1831(4)  | -447(4)  | 3092(2) | 16(1) |
| C(22) | 2721(4)  | -1638(4) | 3326(2) | 18(1) |
| C(23) | 2386(4)  | -2797(4) | 3275(2) | 18(1) |
| C(24) | 1104(4)  | -2730(4) | 2987(2) | 20(1) |
| C(25) | 211(4)   | -1557(4) | 2725(2) | 19(1) |
| C(26) | 584(4)   | -388(4)  | 2742(2) | 14(1) |
| C(27) | 3350(4)  | -4082(4) | 3560(3) | 26(1) |

|       |          |         |         |       |
|-------|----------|---------|---------|-------|
| C(28) | -992(4)  | 2306(4) | 1354(2) | 16(1) |
| C(29) | -666(4)  | 1023(4) | 1692(2) | 15(1) |
| C(30) | -810(4)  | 34(4)   | 1199(2) | 16(1) |
| C(31) | -1372(4) | 326(4)  | 465(2)  | 18(1) |
| C(32) | -1824(4) | 1608(4) | 163(2)  | 20(1) |
| C(33) | -1585(4) | 2576(4) | 615(2)  | 18(1) |
| C(34) | -2526(4) | 1917(4) | -617(2) | 28(1) |
| C(35) | -1868(4) | 5033(4) | 1802(2) | 17(1) |
| C(36) | -3223(4) | 5013(4) | 1825(2) | 21(1) |
| C(37) | -4278(4) | 6182(4) | 1803(3) | 25(1) |
| C(38) | -3991(4) | 7371(4) | 1772(3) | 27(1) |
| C(39) | -2655(4) | 7393(4) | 1753(3) | 27(1) |
| C(40) | -1589(4) | 6235(4) | 1761(2) | 24(1) |
| C(41) | 946(4)   | 3863(4) | 1414(2) | 17(1) |
| C(42) | 1167(4)  | 3806(4) | 614(2)  | 26(1) |
| C(43) | 2348(4)  | 3988(4) | 284(2)  | 27(1) |
| C(44) | 3327(5)  | 4232(4) | 751(3)  | 29(1) |
| C(45) | 3108(4)  | 4305(4) | 1553(3) | 26(1) |
| C(46) | 1938(4)  | 4118(4) | 1881(2) | 20(1) |

---

Table S8. Bond lengths [Å] and angles [°] for **3**.

|            |            |              |          |
|------------|------------|--------------|----------|
| Ir(1)-N(1) | 2.104(3)   | C(8)-H(8B)   | 0.9900   |
| Ir(1)-C(1) | 2.116(4)   | C(9)-C(14)   | 1.390(5) |
| Ir(1)-C(2) | 2.142(4)   | C(9)-C(10)   | 1.397(5) |
| Ir(1)-C(6) | 2.179(4)   | C(10)-C(11)  | 1.386(5) |
| Ir(1)-C(5) | 2.185(4)   | C(10)-H(10A) | 0.9500   |
| Ir(1)-P(1) | 2.2827(12) | C(11)-C(12)  | 1.372(6) |
| Ir(1)-P(2) | 2.3525(13) | C(11)-H(11A) | 0.9500   |
| P(1)-C(28) | 1.799(4)   | C(12)-C(13)  | 1.384(6) |
| P(1)-C(35) | 1.835(4)   | C(12)-H(12A) | 0.9500   |
| P(1)-C(41) | 1.839(4)   | C(13)-C(14)  | 1.386(6) |
| P(2)-C(15) | 1.822(4)   | C(13)-H(13A) | 0.9500   |
| P(2)-C(21) | 1.826(4)   | C(14)-H(14A) | 0.9500   |
| P(2)-C(9)  | 1.839(4)   | C(15)-C(20)  | 1.391(6) |
| N(1)-C(29) | 1.385(5)   | C(15)-C(16)  | 1.391(5) |
| N(1)-C(26) | 1.414(5)   | C(16)-C(17)  | 1.389(6) |
| C(1)-C(2)  | 1.439(6)   | C(16)-H(16A) | 0.9500   |
| C(1)-C(8)  | 1.518(6)   | C(17)-C(18)  | 1.384(6) |
| C(1)-H(1A) | 1.0000     | C(17)-H(17A) | 0.9500   |
| C(2)-C(3)  | 1.515(5)   | C(18)-C(19)  | 1.379(6) |
| C(2)-H(2A) | 1.0000     | C(18)-H(18A) | 0.9500   |
| C(3)-C(4)  | 1.525(6)   | C(19)-C(20)  | 1.392(5) |
| C(3)-H(3A) | 0.9900     | C(19)-H(19A) | 0.9500   |
| C(3)-H(3B) | 0.9900     | C(20)-H(20A) | 0.9500   |
| C(4)-C(5)  | 1.519(6)   | C(21)-C(22)  | 1.386(5) |
| C(4)-H(4A) | 0.9900     | C(21)-C(26)  | 1.403(5) |
| C(4)-H(4B) | 0.9900     | C(22)-C(23)  | 1.380(5) |
| C(5)-C(6)  | 1.400(6)   | C(22)-H(22A) | 0.9500   |
| C(5)-H(5A) | 1.0000     | C(23)-C(24)  | 1.390(6) |
| C(6)-C(7)  | 1.526(6)   | C(23)-C(27)  | 1.513(5) |
| C(6)-H(6A) | 1.0000     | C(24)-C(25)  | 1.388(5) |
| C(7)-C(8)  | 1.513(6)   | C(24)-H(24A) | 0.9500   |
| C(7)-H(7A) | 0.9900     | C(25)-C(26)  | 1.405(5) |
| C(7)-H(7B) | 0.9900     | C(25)-H(25A) | 0.9500   |
| C(8)-H(8A) | 0.9900     | C(27)-H(27A) | 0.9800   |

|              |          |                  |            |
|--------------|----------|------------------|------------|
| C(27)-H(27B) | 0.9800   | C(46)-H(46A)     | 0.9500     |
| C(27)-H(27C) | 0.9800   |                  |            |
| C(28)-C(33)  | 1.398(5) | N(1)-Ir(1)-C(1)  | 84.58(14)  |
| C(28)-C(29)  | 1.423(5) | N(1)-Ir(1)-C(2)  | 88.98(13)  |
| C(29)-C(30)  | 1.405(5) | C(1)-Ir(1)-C(2)  | 39.51(15)  |
| C(30)-C(31)  | 1.380(5) | N(1)-Ir(1)-C(6)  | 156.41(14) |
| C(30)-H(30A) | 0.9500   | C(1)-Ir(1)-C(6)  | 79.60(16)  |
| C(31)-C(32)  | 1.400(6) | C(2)-Ir(1)-C(6)  | 89.85(15)  |
| C(31)-H(31A) | 0.9500   | N(1)-Ir(1)-C(5)  | 163.37(13) |
| C(32)-C(33)  | 1.381(6) | C(1)-Ir(1)-C(5)  | 94.95(16)  |
| C(32)-C(34)  | 1.508(5) | C(2)-Ir(1)-C(5)  | 80.36(15)  |
| C(33)-H(33A) | 0.9500   | C(6)-Ir(1)-C(5)  | 37.42(15)  |
| C(34)-H(34A) | 0.9800   | N(1)-Ir(1)-P(1)  | 82.25(9)   |
| C(34)-H(34B) | 0.9800   | C(1)-Ir(1)-P(1)  | 109.91(12) |
| C(34)-H(34C) | 0.9800   | C(2)-Ir(1)-P(1)  | 149.14(11) |
| C(35)-C(40)  | 1.392(6) | C(6)-Ir(1)-P(1)  | 86.79(11)  |
| C(35)-C(36)  | 1.392(5) | C(5)-Ir(1)-P(1)  | 113.29(11) |
| C(36)-C(37)  | 1.392(6) | N(1)-Ir(1)-P(2)  | 78.54(9)   |
| C(36)-H(36A) | 0.9500   | C(1)-Ir(1)-P(2)  | 135.17(11) |
| C(37)-C(38)  | 1.381(6) | C(2)-Ir(1)-P(2)  | 98.53(11)  |
| C(37)-H(37A) | 0.9500   | C(6)-Ir(1)-P(2)  | 124.90(11) |
| C(38)-C(39)  | 1.374(6) | C(5)-Ir(1)-P(2)  | 90.39(11)  |
| C(38)-H(38A) | 0.9500   | P(1)-Ir(1)-P(2)  | 108.50(5)  |
| C(39)-C(40)  | 1.390(6) | C(28)-P(1)-C(35) | 105.87(18) |
| C(39)-H(39A) | 0.9500   | C(28)-P(1)-C(41) | 107.57(18) |
| C(40)-H(40A) | 0.9500   | C(35)-P(1)-C(41) | 102.23(18) |
| C(41)-C(42)  | 1.383(6) | C(28)-P(1)-Ir(1) | 101.19(13) |
| C(41)-C(46)  | 1.392(6) | C(35)-P(1)-Ir(1) | 119.39(13) |
| C(42)-C(43)  | 1.387(6) | C(41)-P(1)-Ir(1) | 119.49(13) |
| C(42)-H(42A) | 0.9500   | C(15)-P(2)-C(21) | 107.53(18) |
| C(43)-C(44)  | 1.375(6) | C(15)-P(2)-C(9)  | 105.63(18) |
| C(43)-H(43A) | 0.9500   | C(21)-P(2)-C(9)  | 100.37(17) |
| C(44)-C(45)  | 1.386(6) | C(15)-P(2)-Ir(1) | 115.38(13) |
| C(44)-H(44A) | 0.9500   | C(21)-P(2)-Ir(1) | 98.72(13)  |
| C(45)-C(46)  | 1.378(6) | C(9)-P(2)-Ir(1)  | 126.34(13) |
| C(45)-H(45A) | 0.9500   | C(29)-N(1)-C(26) | 121.4(3)   |

|                  |          |                    |          |
|------------------|----------|--------------------|----------|
| C(29)-N(1)-Ir(1) | 119.9(2) | C(7)-C(6)-H(6A)    | 113.9    |
| C(26)-N(1)-Ir(1) | 115.6(2) | Ir(1)-C(6)-H(6A)   | 113.9    |
| C(2)-C(1)-C(8)   | 122.7(4) | C(8)-C(7)-C(6)     | 113.9(3) |
| C(2)-C(1)-Ir(1)  | 71.2(2)  | C(8)-C(7)-H(7A)    | 108.8    |
| C(8)-C(1)-Ir(1)  | 115.7(3) | C(6)-C(7)-H(7A)    | 108.8    |
| C(2)-C(1)-H(1A)  | 113.5    | C(8)-C(7)-H(7B)    | 108.8    |
| C(8)-C(1)-H(1A)  | 113.5    | C(6)-C(7)-H(7B)    | 108.8    |
| Ir(1)-C(1)-H(1A) | 113.5    | H(7A)-C(7)-H(7B)   | 107.7    |
| C(1)-C(2)-C(3)   | 120.8(4) | C(7)-C(8)-C(1)     | 112.8(4) |
| C(1)-C(2)-Ir(1)  | 69.3(2)  | C(7)-C(8)-H(8A)    | 109.0    |
| C(3)-C(2)-Ir(1)  | 115.3(3) | C(1)-C(8)-H(8A)    | 109.0    |
| C(1)-C(2)-H(2A)  | 114.6    | C(7)-C(8)-H(8B)    | 109.0    |
| C(3)-C(2)-H(2A)  | 114.6    | C(1)-C(8)-H(8B)    | 109.0    |
| Ir(1)-C(2)-H(2A) | 114.6    | H(8A)-C(8)-H(8B)   | 107.8    |
| C(2)-C(3)-C(4)   | 114.1(3) | C(14)-C(9)-C(10)   | 119.0(3) |
| C(2)-C(3)-H(3A)  | 108.7    | C(14)-C(9)-P(2)    | 125.9(3) |
| C(4)-C(3)-H(3A)  | 108.7    | C(10)-C(9)-P(2)    | 115.2(3) |
| C(2)-C(3)-H(3B)  | 108.7    | C(11)-C(10)-C(9)   | 120.6(4) |
| C(4)-C(3)-H(3B)  | 108.7    | C(11)-C(10)-H(10A) | 119.7    |
| H(3A)-C(3)-H(3B) | 107.6    | C(9)-C(10)-H(10A)  | 119.7    |
| C(5)-C(4)-C(3)   | 113.9(3) | C(12)-C(11)-C(10)  | 119.8(4) |
| C(5)-C(4)-H(4A)  | 108.8    | C(12)-C(11)-H(11A) | 120.1    |
| C(3)-C(4)-H(4A)  | 108.8    | C(10)-C(11)-H(11A) | 120.1    |
| C(5)-C(4)-H(4B)  | 108.8    | C(11)-C(12)-C(13)  | 120.3(4) |
| C(3)-C(4)-H(4B)  | 108.8    | C(11)-C(12)-H(12A) | 119.8    |
| H(4A)-C(4)-H(4B) | 107.7    | C(13)-C(12)-H(12A) | 119.8    |
| C(6)-C(5)-C(4)   | 121.6(4) | C(12)-C(13)-C(14)  | 120.3(4) |
| C(6)-C(5)-Ir(1)  | 71.1(2)  | C(12)-C(13)-H(13A) | 119.8    |
| C(4)-C(5)-Ir(1)  | 112.7(3) | C(14)-C(13)-H(13A) | 119.8    |
| C(6)-C(5)-H(5A)  | 114.7    | C(13)-C(14)-C(9)   | 120.0(4) |
| C(4)-C(5)-H(5A)  | 114.7    | C(13)-C(14)-H(14A) | 120.0    |
| Ir(1)-C(5)-H(5A) | 114.7    | C(9)-C(14)-H(14A)  | 120.0    |
| C(5)-C(6)-C(7)   | 122.7(4) | C(20)-C(15)-C(16)  | 118.9(4) |
| C(5)-C(6)-Ir(1)  | 71.5(2)  | C(20)-C(15)-P(2)   | 120.9(3) |
| C(7)-C(6)-Ir(1)  | 114.2(3) | C(16)-C(15)-P(2)   | 119.2(3) |
| C(5)-C(6)-H(6A)  | 113.9    | C(17)-C(16)-C(15)  | 120.8(4) |

|                     |          |                     |          |
|---------------------|----------|---------------------|----------|
| C(17)-C(16)-H(16A)  | 119.6    | H(27A)-C(27)-H(27C) | 109.5    |
| C(15)-C(16)-H(16A)  | 119.6    | H(27B)-C(27)-H(27C) | 109.5    |
| C(18)-C(17)-C(16)   | 119.7(4) | C(33)-C(28)-C(29)   | 121.1(4) |
| C(18)-C(17)-H(17A)  | 120.1    | C(33)-C(28)-P(1)    | 123.8(3) |
| C(16)-C(17)-H(17A)  | 120.1    | C(29)-C(28)-P(1)    | 115.0(3) |
| C(19)-C(18)-C(17)   | 120.0(4) | N(1)-C(29)-C(30)    | 125.6(3) |
| C(19)-C(18)-H(18A)  | 120.0    | N(1)-C(29)-C(28)    | 118.6(3) |
| C(17)-C(18)-H(18A)  | 120.0    | C(30)-C(29)-C(28)   | 115.8(3) |
| C(18)-C(19)-C(20)   | 120.3(4) | C(31)-C(30)-C(29)   | 121.4(4) |
| C(18)-C(19)-H(19A)  | 119.8    | C(31)-C(30)-H(30A)  | 119.3    |
| C(20)-C(19)-H(19A)  | 119.8    | C(29)-C(30)-H(30A)  | 119.3    |
| C(15)-C(20)-C(19)   | 120.2(4) | C(30)-C(31)-C(32)   | 122.7(4) |
| C(15)-C(20)-H(20A)  | 119.9    | C(30)-C(31)-H(31A)  | 118.6    |
| C(19)-C(20)-H(20A)  | 119.9    | C(32)-C(31)-H(31A)  | 118.6    |
| C(22)-C(21)-C(26)   | 120.8(4) | C(33)-C(32)-C(31)   | 116.4(4) |
| C(22)-C(21)-P(2)    | 125.8(3) | C(33)-C(32)-C(34)   | 121.7(4) |
| C(26)-C(21)-P(2)    | 113.4(3) | C(31)-C(32)-C(34)   | 121.9(4) |
| C(23)-C(22)-C(21)   | 121.9(4) | C(32)-C(33)-C(28)   | 122.0(4) |
| C(23)-C(22)-H(22A)  | 119.0    | C(32)-C(33)-H(33A)  | 119.0    |
| C(21)-C(22)-H(22A)  | 119.0    | C(28)-C(33)-H(33A)  | 119.0    |
| C(22)-C(23)-C(24)   | 117.4(4) | C(32)-C(34)-H(34A)  | 109.5    |
| C(22)-C(23)-C(27)   | 121.2(4) | C(32)-C(34)-H(34B)  | 109.5    |
| C(24)-C(23)-C(27)   | 121.3(4) | H(34A)-C(34)-H(34B) | 109.5    |
| C(25)-C(24)-C(23)   | 121.8(4) | C(32)-C(34)-H(34C)  | 109.5    |
| C(25)-C(24)-H(24A)  | 119.1    | H(34A)-C(34)-H(34C) | 109.5    |
| C(23)-C(24)-H(24A)  | 119.1    | H(34B)-C(34)-H(34C) | 109.5    |
| C(24)-C(25)-C(26)   | 120.6(4) | C(40)-C(35)-C(36)   | 119.0(4) |
| C(24)-C(25)-H(25A)  | 119.7    | C(40)-C(35)-P(1)    | 121.4(3) |
| C(26)-C(25)-H(25A)  | 119.7    | C(36)-C(35)-P(1)    | 119.4(3) |
| C(21)-C(26)-C(25)   | 117.1(3) | C(37)-C(36)-C(35)   | 120.2(4) |
| C(21)-C(26)-N(1)    | 118.0(3) | C(37)-C(36)-H(36A)  | 119.9    |
| C(25)-C(26)-N(1)    | 124.8(3) | C(35)-C(36)-H(36A)  | 119.9    |
| C(23)-C(27)-H(27A)  | 109.5    | C(38)-C(37)-C(36)   | 120.4(4) |
| C(23)-C(27)-H(27B)  | 109.5    | C(38)-C(37)-H(37A)  | 119.8    |
| H(27A)-C(27)-H(27B) | 109.5    | C(36)-C(37)-H(37A)  | 119.8    |
| C(23)-C(27)-H(27C)  | 109.5    | C(39)-C(38)-C(37)   | 119.5(4) |

|                    |          |                    |          |
|--------------------|----------|--------------------|----------|
| C(39)-C(38)-H(38A) | 120.3    | C(43)-C(42)-H(42A) | 119.4    |
| C(37)-C(38)-H(38A) | 120.3    | C(44)-C(43)-C(42)  | 120.4(4) |
| C(38)-C(39)-C(40)  | 120.9(4) | C(44)-C(43)-H(43A) | 119.8    |
| C(38)-C(39)-H(39A) | 119.6    | C(42)-C(43)-H(43A) | 119.8    |
| C(40)-C(39)-H(39A) | 119.6    | C(43)-C(44)-C(45)  | 119.0(4) |
| C(39)-C(40)-C(35)  | 120.0(4) | C(43)-C(44)-H(44A) | 120.5    |
| C(39)-C(40)-H(40A) | 120.0    | C(45)-C(44)-H(44A) | 120.5    |
| C(35)-C(40)-H(40A) | 120.0    | C(46)-C(45)-C(44)  | 120.6(4) |
| C(42)-C(41)-C(46)  | 118.1(4) | C(46)-C(45)-H(45A) | 119.7    |
| C(42)-C(41)-P(1)   | 124.9(3) | C(44)-C(45)-H(45A) | 119.7    |
| C(46)-C(41)-P(1)   | 116.8(3) | C(45)-C(46)-C(41)  | 120.8(4) |
| C(41)-C(42)-C(43)  | 121.1(4) | C(45)-C(46)-H(46A) | 119.6    |
| C(41)-C(42)-H(42A) | 119.4    | C(41)-C(46)-H(46A) | 119.6    |

---

Symmetry transformations used to generate equivalent atoms:

Table S9. Anisotropic displacement parameters ( $\text{\AA}^2 \times 10^3$ ) for **3**. The anisotropic displacement factor exponent takes the form:  $-2p^2[ h^2 a^* U^{11} + \dots + 2 h k a^* b^* U^{12} ]$

|       | U <sup>11</sup> | U <sup>22</sup> | U <sup>33</sup> | U <sup>23</sup> | U <sup>13</sup> | U <sup>12</sup> |
|-------|-----------------|-----------------|-----------------|-----------------|-----------------|-----------------|
| Ir(1) | 15(1)           | 13(1)           | 15(1)           | 0(1)            | -1(1)           | -4(1)           |
| P(1)  | 17(1)           | 13(1)           | 15(1)           | 1(1)            | -2(1)           | -4(1)           |
| P(2)  | 14(1)           | 13(1)           | 16(1)           | 0(1)            | -1(1)           | -4(1)           |
| N(1)  | 20(2)           | 12(2)           | 13(2)           | 0(1)            | -2(1)           | -5(1)           |
| C(1)  | 15(2)           | 28(2)           | 21(2)           | -1(2)           | 4(2)            | -9(2)           |
| C(2)  | 18(2)           | 17(2)           | 16(2)           | -1(2)           | 2(2)            | -7(2)           |
| C(3)  | 24(2)           | 26(2)           | 21(2)           | 3(2)            | 4(2)            | -6(2)           |
| C(4)  | 27(2)           | 20(2)           | 18(2)           | -4(2)           | -5(2)           | -4(2)           |
| C(5)  | 23(2)           | 15(2)           | 23(2)           | -5(2)           | -1(2)           | -7(2)           |
| C(6)  | 30(2)           | 14(2)           | 18(2)           | -5(2)           | 4(2)            | -5(2)           |
| C(7)  | 28(3)           | 26(2)           | 32(3)           | -9(2)           | -3(2)           | 6(2)            |
| C(8)  | 25(2)           | 32(3)           | 33(3)           | 10(2)           | 7(2)            | 5(2)            |
| C(9)  | 15(2)           | 11(2)           | 24(2)           | -1(2)           | 1(2)            | -4(2)           |
| C(10) | 14(2)           | 17(2)           | 25(2)           | 0(2)            | -1(2)           | -6(2)           |
| C(11) | 26(2)           | 19(2)           | 19(2)           | -1(2)           | 0(2)            | -6(2)           |
| C(12) | 22(2)           | 24(2)           | 28(2)           | -2(2)           | 9(2)            | -4(2)           |
| C(13) | 14(2)           | 27(2)           | 36(3)           | -3(2)           | -1(2)           | -5(2)           |
| C(14) | 19(2)           | 22(2)           | 23(2)           | -2(2)           | 1(2)            | -6(2)           |
| C(15) | 17(2)           | 17(2)           | 16(2)           | -2(2)           | -4(2)           | -5(2)           |
| C(16) | 17(2)           | 20(2)           | 22(2)           | -2(2)           | 1(2)            | -4(2)           |
| C(17) | 21(2)           | 23(2)           | 30(3)           | -5(2)           | -2(2)           | -8(2)           |
| C(18) | 20(2)           | 32(2)           | 21(2)           | -5(2)           | -5(2)           | -5(2)           |
| C(19) | 21(2)           | 27(2)           | 16(2)           | 6(2)            | -4(2)           | -4(2)           |
| C(20) | 17(2)           | 18(2)           | 24(2)           | -1(2)           | -2(2)           | -5(2)           |
| C(21) | 16(2)           | 16(2)           | 15(2)           | 0(2)            | 2(2)            | -4(2)           |
| C(22) | 15(2)           | 22(2)           | 16(2)           | 0(2)            | -2(2)           | -6(2)           |
| C(23) | 23(2)           | 14(2)           | 15(2)           | 0(2)            | 1(2)            | -3(2)           |
| C(24) | 27(2)           | 15(2)           | 19(2)           | -2(2)           | 0(2)            | -10(2)          |
| C(25) | 19(2)           | 19(2)           | 20(2)           | -1(2)           | -4(2)           | -7(2)           |
| C(26) | 16(2)           | 14(2)           | 13(2)           | -4(2)           | 1(2)            | -4(2)           |
| C(27) | 31(2)           | 18(2)           | 26(2)           | 1(2)            | -2(2)           | 0(2)            |



|       |       |       |       |       |        |        |
|-------|-------|-------|-------|-------|--------|--------|
| C(28) | 13(2) | 18(2) | 18(2) | -1(2) | -2(2)  | -5(2)  |
| C(29) | 8(2)  | 19(2) | 18(2) | -1(2) | 2(2)   | -4(2)  |
| C(30) | 13(2) | 19(2) | 17(2) | -2(2) | 0(2)   | -6(2)  |
| C(31) | 13(2) | 20(2) | 22(2) | -7(2) | -1(2)  | -5(2)  |
| C(32) | 16(2) | 25(2) | 17(2) | -1(2) | 1(2)   | -6(2)  |
| C(33) | 16(2) | 19(2) | 19(2) | 3(2)  | -2(2)  | -3(2)  |
| C(34) | 31(3) | 29(2) | 24(2) | 0(2)  | -10(2) | -9(2)  |
| C(35) | 22(2) | 17(2) | 11(2) | -1(2) | -5(2)  | -3(2)  |
| C(36) | 22(2) | 17(2) | 26(2) | 2(2)  | -1(2)  | -9(2)  |
| C(37) | 19(2) | 25(2) | 33(3) | 5(2)  | -4(2)  | -6(2)  |
| C(38) | 23(2) | 19(2) | 34(3) | 3(2)  | -8(2)  | 0(2)   |
| C(39) | 27(2) | 15(2) | 40(3) | -1(2) | -9(2)  | -9(2)  |
| C(40) | 21(2) | 23(2) | 28(2) | 3(2)  | -8(2)  | -9(2)  |
| C(41) | 21(2) | 13(2) | 17(2) | 3(2)  | 1(2)   | -4(2)  |
| C(42) | 27(2) | 28(2) | 22(2) | 8(2)  | -4(2)  | -8(2)  |
| C(43) | 30(2) | 28(2) | 19(2) | 8(2)  | 2(2)   | -5(2)  |
| C(44) | 30(3) | 25(2) | 35(3) | 5(2)  | 6(2)   | -12(2) |
| C(45) | 27(2) | 22(2) | 34(3) | 0(2)  | -2(2)  | -14(2) |
| C(46) | 26(2) | 15(2) | 20(2) | 1(2)  | 0(2)   | -9(2)  |

---

For **16**: Crystals were grown from vapor diffusion pentane into a concentrated solution of **16** in fluorobenzene at -30 °C. The unit cell contained one molecule of fluorobenzene.

Table S10. Crystal data and structure refinement for complex **16**.

|                                   |                                                          |                 |
|-----------------------------------|----------------------------------------------------------|-----------------|
| Empirical formula                 | C <sub>62</sub> H <sub>47</sub> F Ir N P <sub>2</sub> Si |                 |
| Formula weight                    | 1107.24                                                  |                 |
| Temperature                       | 100(2) K                                                 |                 |
| Wavelength                        | 1.54178 Å                                                |                 |
| Crystal system                    | Monoclinic                                               |                 |
| Space group                       | P 21/ c                                                  |                 |
| Unit cell dimensions              | a = 13.1135(8) Å                                         | α = 90°.        |
|                                   | b = 15.3247(9) Å                                         | β = 98.463(4)°. |
|                                   | c = 25.2279(16) Å                                        | γ = 90°.        |
| Volume                            | 5014.6(5) Å <sup>3</sup>                                 |                 |
| Z                                 | 4                                                        |                 |
| Density (calculated)              | 1.467 g/cm <sup>3</sup>                                  |                 |
| Absorption coefficient            | 6.334 mm <sup>-1</sup>                                   |                 |
| F(000)                            | 2224                                                     |                 |
| Crystal size                      | 0.20 x 0.15 x 0.04 mm <sup>3</sup>                       |                 |
| Crystal color/habit               | orange plate                                             |                 |
| Theta range for data collection   | 3.38 to 67.70°.                                          |                 |
| Index ranges                      | -15 ≤ h ≤ 15, -17 ≤ k ≤ 14, -30 ≤ l ≤ 30                 |                 |
| Reflections collected             | 46231                                                    |                 |
| Independent reflections           | 8821 [R(int) = 0.0675]                                   |                 |
| Completeness to theta = 67.70°    | 97.1 %                                                   |                 |
| Absorption correction             | Analytical                                               |                 |
| Max. and min. transmission        | 0.7857 and 0.3640                                        |                 |
| Refinement method                 | Full-matrix least-squares on F <sup>2</sup>              |                 |
| Data / restraints / parameters    | 8821 / 30 / 580                                          |                 |
| Goodness-of-fit on F <sup>2</sup> | 1.192                                                    |                 |
| Final R indices [I > 2σ(I)]       | R1 = 0.0382, wR2 = 0.0918                                |                 |
| R indices (all data)              | R1 = 0.0562, wR2 = 0.0987                                |                 |
| Largest diff. peak and hole       | 2.035 and -0.973 e. Å <sup>-3</sup>                      |                 |

Table S11. Atomic coordinates ( $\times 10^4$ ) and equivalent isotropic displacement parameters ( $\text{\AA}^2 \times 10^3$ ) for **16**.  $U(\text{eq})$  is defined as one third of the trace of the orthogonalized  $U_{ij}$  tensor.

|       | x       | y        | z        | $U(\text{eq})$ |
|-------|---------|----------|----------|----------------|
| Ir(1) | 3293(1) | 9045(1)  | 8442(1)  | 12(1)          |
| Si(1) | 2362(1) | 8986(1)  | 9156(1)  | 14(1)          |
| P(1)  | 2385(1) | 10104(1) | 7943(1)  | 14(1)          |
| P(2)  | 4449(1) | 7932(1)  | 8670(1)  | 13(1)          |
| N(1)  | 3302(3) | 8495(3)  | 7694(2)  | 13(1)          |
| C(1)  | 2699(3) | 9846(3)  | 7281(2)  | 14(1)          |
| C(2)  | 2533(3) | 10414(3) | 6843(2)  | 16(1)          |
| C(3)  | 2816(4) | 10199(4) | 6352(2)  | 19(1)          |
| C(4)  | 3291(4) | 9384(3)  | 6318(2)  | 19(1)          |
| C(5)  | 3444(4) | 8809(3)  | 6741(2)  | 18(1)          |
| C(6)  | 3134(3) | 9019(3)  | 7235(2)  | 16(1)          |
| C(7)  | 3540(3) | 7594(3)  | 7659(2)  | 14(1)          |
| C(8)  | 4141(3) | 7200(3)  | 8099(2)  | 14(1)          |
| C(9)  | 5750(3) | 8342(3)  | 8650(2)  | 14(1)          |
| C(10) | 6034(4) | 9142(3)  | 8884(2)  | 19(1)          |
| C(11) | 7040(4) | 9441(4)  | 8920(2)  | 22(1)          |
| C(12) | 7754(4) | 8943(4)  | 8703(2)  | 25(1)          |
| C(13) | 7469(4) | 8161(4)  | 8449(2)  | 28(1)          |
| C(14) | 6468(4) | 7851(4)  | 8425(2)  | 19(1)          |
| C(15) | 4625(4) | 7213(3)  | 9256(2)  | 19(1)          |
| C(16) | 5483(5) | 7291(4)  | 9642(2)  | 26(1)          |
| C(17) | 5610(5) | 6754(4)  | 10092(2) | 36(2)          |
| C(18) | 4887(5) | 6146(4)  | 10154(2) | 39(2)          |
| C(19) | 4022(5) | 6059(5)  | 9774(3)  | 50(2)          |
| C(20) | 3893(4) | 6595(5)  | 9326(3)  | 39(2)          |
| C(21) | 4403(4) | 6319(3)  | 8085(2)  | 20(1)          |
| C(22) | 4055(4) | 5802(3)  | 7642(2)  | 20(1)          |
| C(23) | 4349(4) | 4861(4)  | 7610(2)  | 29(1)          |
| C(24) | 3411(4) | 6199(3)  | 7216(2)  | 19(1)          |
| C(25) | 3153(3) | 7071(4)  | 7223(2)  | 19(1)          |

|       |          |          |          |         |
|-------|----------|----------|----------|---------|
| C(26) | 2643(5)  | 10803(4) | 5878(2)  | 30(1)   |
| C(27) | 2739(4)  | 11237(3) | 8079(2)  | 19(1)   |
| C(28) | 2287(5)  | 11711(4) | 8451(2)  | 28(1)   |
| C(29) | 2607(5)  | 12554(4) | 8582(2)  | 35(2)   |
| C(30) | 3379(5)  | 12948(4) | 8341(2)  | 39(2)   |
| C(31) | 3854(4)  | 12460(4) | 7983(2)  | 28(1)   |
| C(32) | 3542(4)  | 11620(4) | 7853(2)  | 19(1)   |
| C(33) | 979(4)   | 10047(4) | 7829(2)  | 20(1)   |
| C(34) | 327(4)   | 10766(4) | 7754(2)  | 30(1)   |
| C(35) | -731(5)  | 10642(5) | 7673(2)  | 39(2)   |
| C(36) | -1139(4) | 9826(6)  | 7651(2)  | 45(2)   |
| C(37) | -501(4)  | 9101(5)  | 7710(3)  | 42(2)   |
| C(38) | 563(4)   | 9212(4)  | 7804(2)  | 27(1)   |
| C(39) | 3118(4)  | 8701(3)  | 9842(2)  | 18(1)   |
| C(40) | 2651(5)  | 8220(4)  | 10206(2) | 31(1)   |
| C(41) | 3162(5)  | 8051(4)  | 10720(2) | 37(2)   |
| C(42) | 4144(5)  | 8346(4)  | 10881(2) | 31(1)   |
| C(43) | 4625(4)  | 8819(4)  | 10523(2) | 26(1)   |
| C(44) | 4111(4)  | 8993(4)  | 10012(2) | 22(1)   |
| C(45) | 1350(4)  | 8100(3)  | 9007(2)  | 17(1)   |
| C(46) | 478(4)   | 8067(4)  | 9271(2)  | 23(1)   |
| C(47) | -216(4)  | 7382(4)  | 9188(2)  | 30(1)   |
| C(48) | -60(4)   | 6711(4)  | 8843(3)  | 35(2)   |
| C(49) | 775(4)   | 6730(4)  | 8578(2)  | 31(1)   |
| C(50) | 1469(4)  | 7414(4)  | 8656(2)  | 22(1)   |
| C(51) | 1643(4)  | 10016(4) | 9309(2)  | 19(1)   |
| C(52) | 2149(4)  | 10654(4) | 9650(2)  | 24(1)   |
| C(53) | 1671(4)  | 11421(4) | 9765(2)  | 32(1)   |
| C(54) | 654(5)   | 11574(4) | 9537(2)  | 35(2)   |
| C(55) | 126(4)   | 10957(4) | 9202(2)  | 32(1)   |
| C(56) | 618(4)   | 10184(4) | 9091(2)  | 21(1)   |
| C(57) | 1051(10) | 4407(10) | 9071(6)  | 127(5)  |
| C(58) | 336(11)  | 4203(9)  | 8664(5)  | 124(5)  |
| C(59) | -567(10) | 3805(9)  | 8765(5)  | 117(5)  |
| C(60) | -784(9)  | 3776(9)  | 9277(6)  | 109(4)  |
| C(61) | -57(14)  | 4045(13) | 9689(6)  | 219(10) |

|       |         |          |         |        |
|-------|---------|----------|---------|--------|
| C(62) | 896(12) | 4280(12) | 9583(6) | 176(8) |
| F(1)  | 2010(9) | 4728(7)  | 8986(4) | 197(4) |

---

Table S12. Bond lengths [Å] and angles [°] for **16**.

|              |            |              |           |
|--------------|------------|--------------|-----------|
| Ir(1)-N(1)   | 2.067(4)   | C(12)-C(13)  | 1.385(8)  |
| Ir(1)-P(1)   | 2.2800(12) | C(12)-H(12A) | 0.9500    |
| Ir(1)-P(2)   | 2.2978(12) | C(13)-C(14)  | 1.389(7)  |
| Ir(1)-Si(1)  | 2.3220(13) | C(13)-H(13A) | 0.9500    |
| Si(1)-C(45)  | 1.897(5)   | C(14)-H(14A) | 0.9500    |
| Si(1)-C(51)  | 1.907(6)   | C(15)-C(20)  | 1.379(8)  |
| Si(1)-C(39)  | 1.913(5)   | C(15)-C(16)  | 1.382(7)  |
| P(1)-C(27)   | 1.816(5)   | C(16)-C(17)  | 1.390(8)  |
| P(1)-C(1)    | 1.823(5)   | C(16)-H(16A) | 0.9500    |
| P(1)-C(33)   | 1.825(5)   | C(17)-C(18)  | 1.355(9)  |
| P(2)-C(8)    | 1.824(5)   | C(17)-H(17A) | 0.9500    |
| P(2)-C(9)    | 1.825(5)   | C(18)-C(19)  | 1.381(10) |
| P(2)-C(15)   | 1.830(5)   | C(18)-H(18A) | 0.9500    |
| N(1)-C(6)    | 1.402(6)   | C(19)-C(20)  | 1.387(8)  |
| N(1)-C(7)    | 1.421(6)   | C(19)-H(19A) | 0.9500    |
| C(1)-C(2)    | 1.396(7)   | C(20)-H(20A) | 0.9500    |
| C(1)-C(6)    | 1.402(7)   | C(21)-C(22)  | 1.392(7)  |
| C(2)-C(3)    | 1.385(7)   | C(21)-H(21A) | 0.9500    |
| C(2)-H(2A)   | 0.9500     | C(22)-C(24)  | 1.404(7)  |
| C(3)-C(4)    | 1.404(7)   | C(22)-C(23)  | 1.497(7)  |
| C(3)-C(26)   | 1.502(7)   | C(23)-H(23A) | 0.9800    |
| C(4)-C(5)    | 1.375(7)   | C(23)-H(23B) | 0.9800    |
| C(4)-H(4A)   | 0.9500     | C(23)-H(23C) | 0.9800    |
| C(5)-C(6)    | 1.404(7)   | C(24)-C(25)  | 1.380(7)  |
| C(5)-H(5A)   | 0.9500     | C(24)-H(24A) | 0.9500    |
| C(7)-C(25)   | 1.395(7)   | C(25)-H(25A) | 0.9500    |
| C(7)-C(8)    | 1.400(6)   | C(26)-H(26A) | 0.9800    |
| C(8)-C(21)   | 1.395(7)   | C(26)-H(26B) | 0.9800    |
| C(9)-C(10)   | 1.388(7)   | C(26)-H(26C) | 0.9800    |
| C(9)-C(14)   | 1.389(7)   | C(27)-C(28)  | 1.387(7)  |
| C(10)-C(11)  | 1.386(7)   | C(27)-C(32)  | 1.399(7)  |
| C(10)-H(10A) | 0.9500     | C(28)-C(29)  | 1.384(8)  |
| C(11)-C(12)  | 1.382(8)   | C(28)-H(28A) | 0.9500    |
| C(11)-H(11A) | 0.9500     | C(29)-C(30)  | 1.393(9)  |

|              |           |                   |            |
|--------------|-----------|-------------------|------------|
| C(29)-H(29A) | 0.9500    | C(49)-C(50)       | 1.384(8)   |
| C(30)-C(31)  | 1.388(8)  | C(49)-H(49A)      | 0.9500     |
| C(30)-H(30A) | 0.9500    | C(50)-H(50A)      | 0.9500     |
| C(31)-C(32)  | 1.375(8)  | C(51)-C(56)       | 1.399(6)   |
| C(31)-H(31A) | 0.9500    | C(51)-C(52)       | 1.404(7)   |
| C(32)-H(32A) | 0.9500    | C(52)-C(53)       | 1.382(8)   |
| C(33)-C(38)  | 1.388(8)  | C(52)-H(52A)      | 0.9500     |
| C(33)-C(34)  | 1.391(7)  | C(53)-C(54)       | 1.393(8)   |
| C(34)-C(35)  | 1.385(8)  | C(53)-H(53A)      | 0.9500     |
| C(34)-H(34A) | 0.9500    | C(54)-C(55)       | 1.383(9)   |
| C(35)-C(36)  | 1.359(10) | C(54)-H(54A)      | 0.9500     |
| C(35)-H(35A) | 0.9500    | C(55)-C(56)       | 1.398(8)   |
| C(36)-C(37)  | 1.385(10) | C(55)-H(55A)      | 0.9500     |
| C(36)-H(36A) | 0.9500    | C(56)-H(56A)      | 0.9500     |
| C(37)-C(38)  | 1.391(8)  | C(57)-C(58)       | 1.323(11)  |
| C(37)-H(37A) | 0.9500    | C(57)-C(62)       | 1.350(12)  |
| C(38)-H(38A) | 0.9500    | C(57)-F(1)        | 1.395(13)  |
| C(39)-C(44)  | 1.384(7)  | C(58)-C(59)       | 1.389(11)  |
| C(39)-C(40)  | 1.388(8)  | C(59)-C(60)       | 1.362(11)  |
| C(40)-C(41)  | 1.392(7)  | C(60)-C(61)       | 1.367(12)  |
| C(40)-H(40A) | 0.9500    | C(61)-C(62)       | 1.363(12)  |
| C(41)-C(42)  | 1.369(9)  |                   |            |
| C(41)-H(41A) | 0.9500    | N(1)-Ir(1)-P(1)   | 81.90(11)  |
| C(42)-C(43)  | 1.380(8)  | N(1)-Ir(1)-P(2)   | 80.46(11)  |
| C(42)-H(42A) | 0.9500    | P(1)-Ir(1)-P(2)   | 159.81(4)  |
| C(43)-C(44)  | 1.389(7)  | N(1)-Ir(1)-Si(1)  | 140.04(11) |
| C(43)-H(43A) | 0.9500    | P(1)-Ir(1)-Si(1)  | 99.49(4)   |
| C(44)-H(44A) | 0.9500    | P(2)-Ir(1)-Si(1)  | 100.33(5)  |
| C(45)-C(50)  | 1.398(7)  | C(45)-Si(1)-C(51) | 106.3(2)   |
| C(45)-C(46)  | 1.406(7)  | C(45)-Si(1)-C(39) | 105.7(2)   |
| C(46)-C(47)  | 1.385(8)  | C(51)-Si(1)-C(39) | 102.2(2)   |
| C(46)-H(46A) | 0.9500    | C(45)-Si(1)-Ir(1) | 107.79(16) |
| C(47)-C(48)  | 1.381(8)  | C(51)-Si(1)-Ir(1) | 117.11(16) |
| C(47)-H(47A) | 0.9500    | C(39)-Si(1)-Ir(1) | 116.71(16) |
| C(48)-C(49)  | 1.365(8)  | C(27)-P(1)-C(1)   | 107.1(2)   |
| C(48)-H(48A) | 0.9500    | C(27)-P(1)-C(33)  | 107.5(2)   |

|                  |            |                    |          |
|------------------|------------|--------------------|----------|
| C(1)-P(1)-C(33)  | 101.8(2)   | C(7)-C(8)-P(2)     | 113.2(4) |
| C(27)-P(1)-Ir(1) | 118.59(16) | C(10)-C(9)-C(14)   | 119.7(4) |
| C(1)-P(1)-Ir(1)  | 100.46(16) | C(10)-C(9)-P(2)    | 119.0(4) |
| C(33)-P(1)-Ir(1) | 119.06(18) | C(14)-C(9)-P(2)    | 121.2(4) |
| C(8)-P(2)-C(9)   | 106.7(2)   | C(11)-C(10)-C(9)   | 120.9(5) |
| C(8)-P(2)-C(15)  | 104.7(2)   | C(11)-C(10)-H(10A) | 119.5    |
| C(9)-P(2)-C(15)  | 102.9(2)   | C(9)-C(10)-H(10A)  | 119.5    |
| C(8)-P(2)-Ir(1)  | 101.37(15) | C(12)-C(11)-C(10)  | 119.0(5) |
| C(9)-P(2)-Ir(1)  | 108.83(16) | C(12)-C(11)-H(11A) | 120.5    |
| C(15)-P(2)-Ir(1) | 130.49(16) | C(10)-C(11)-H(11A) | 120.5    |
| C(6)-N(1)-C(7)   | 121.0(4)   | C(11)-C(12)-C(13)  | 120.6(5) |
| C(6)-N(1)-Ir(1)  | 120.0(3)   | C(11)-C(12)-H(12A) | 119.7    |
| C(7)-N(1)-Ir(1)  | 118.9(3)   | C(13)-C(12)-H(12A) | 119.7    |
| C(2)-C(1)-C(6)   | 121.0(5)   | C(12)-C(13)-C(14)  | 120.3(5) |
| C(2)-C(1)-P(1)   | 124.0(4)   | C(12)-C(13)-H(13A) | 119.8    |
| C(6)-C(1)-P(1)   | 114.9(4)   | C(14)-C(13)-H(13A) | 119.8    |
| C(3)-C(2)-C(1)   | 121.9(5)   | C(13)-C(14)-C(9)   | 119.3(5) |
| C(3)-C(2)-H(2A)  | 119.1      | C(13)-C(14)-H(14A) | 120.3    |
| C(1)-C(2)-H(2A)  | 119.1      | C(9)-C(14)-H(14A)  | 120.3    |
| C(2)-C(3)-C(4)   | 116.5(5)   | C(20)-C(15)-C(16)  | 118.6(5) |
| C(2)-C(3)-C(26)  | 122.5(5)   | C(20)-C(15)-P(2)   | 120.7(4) |
| C(4)-C(3)-C(26)  | 121.0(5)   | C(16)-C(15)-P(2)   | 120.7(4) |
| C(5)-C(4)-C(3)   | 122.6(5)   | C(15)-C(16)-C(17)  | 120.7(6) |
| C(5)-C(4)-H(4A)  | 118.7      | C(15)-C(16)-H(16A) | 119.6    |
| C(3)-C(4)-H(4A)  | 118.7      | C(17)-C(16)-H(16A) | 119.6    |
| C(4)-C(5)-C(6)   | 120.9(5)   | C(18)-C(17)-C(16)  | 120.0(6) |
| C(4)-C(5)-H(5A)  | 119.6      | C(18)-C(17)-H(17A) | 120.0    |
| C(6)-C(5)-H(5A)  | 119.6      | C(16)-C(17)-H(17A) | 120.0    |
| N(1)-C(6)-C(1)   | 117.8(4)   | C(17)-C(18)-C(19)  | 120.2(6) |
| N(1)-C(6)-C(5)   | 124.9(5)   | C(17)-C(18)-H(18A) | 119.9    |
| C(1)-C(6)-C(5)   | 117.1(5)   | C(19)-C(18)-H(18A) | 119.9    |
| C(25)-C(7)-C(8)  | 118.3(5)   | C(18)-C(19)-C(20)  | 119.9(7) |
| C(25)-C(7)-N(1)  | 123.4(4)   | C(18)-C(19)-H(19A) | 120.0    |
| C(8)-C(7)-N(1)   | 118.2(4)   | C(20)-C(19)-H(19A) | 120.0    |
| C(21)-C(8)-C(7)  | 120.6(5)   | C(15)-C(20)-C(19)  | 120.5(6) |
| C(21)-C(8)-P(2)  | 126.1(4)   | C(15)-C(20)-H(20A) | 119.8    |



|                     |          |                    |          |
|---------------------|----------|--------------------|----------|
| C(19)-C(20)-H(20A)  | 119.8    | C(29)-C(30)-H(30A) | 120.8    |
| C(22)-C(21)-C(8)    | 121.3(5) | C(32)-C(31)-C(30)  | 120.9(6) |
| C(22)-C(21)-H(21A)  | 119.4    | C(32)-C(31)-H(31A) | 119.5    |
| C(8)-C(21)-H(21A)   | 119.4    | C(30)-C(31)-H(31A) | 119.5    |
| C(21)-C(22)-C(24)   | 117.2(5) | C(31)-C(32)-C(27)  | 120.7(5) |
| C(21)-C(22)-C(23)   | 122.3(5) | C(31)-C(32)-H(32A) | 119.6    |
| C(24)-C(22)-C(23)   | 120.5(5) | C(27)-C(32)-H(32A) | 119.6    |
| C(22)-C(23)-H(23A)  | 109.5    | C(38)-C(33)-C(34)  | 119.6(5) |
| C(22)-C(23)-H(23B)  | 109.5    | C(38)-C(33)-P(1)   | 115.7(4) |
| H(23A)-C(23)-H(23B) | 109.5    | C(34)-C(33)-P(1)   | 124.7(5) |
| C(22)-C(23)-H(23C)  | 109.5    | C(35)-C(34)-C(33)  | 119.6(6) |
| H(23A)-C(23)-H(23C) | 109.5    | C(35)-C(34)-H(34A) | 120.2    |
| H(23B)-C(23)-H(23C) | 109.5    | C(33)-C(34)-H(34A) | 120.2    |
| C(25)-C(24)-C(22)   | 122.0(5) | C(36)-C(35)-C(34)  | 120.8(6) |
| C(25)-C(24)-H(24A)  | 119.0    | C(36)-C(35)-H(35A) | 119.6    |
| C(22)-C(24)-H(24A)  | 119.0    | C(34)-C(35)-H(35A) | 119.6    |
| C(24)-C(25)-C(7)    | 120.4(5) | C(35)-C(36)-C(37)  | 120.4(5) |
| C(24)-C(25)-H(25A)  | 119.8    | C(35)-C(36)-H(36A) | 119.8    |
| C(7)-C(25)-H(25A)   | 119.8    | C(37)-C(36)-H(36A) | 119.8    |
| C(3)-C(26)-H(26A)   | 109.5    | C(36)-C(37)-C(38)  | 119.7(7) |
| C(3)-C(26)-H(26B)   | 109.5    | C(36)-C(37)-H(37A) | 120.2    |
| H(26A)-C(26)-H(26B) | 109.5    | C(38)-C(37)-H(37A) | 120.2    |
| C(3)-C(26)-H(26C)   | 109.5    | C(33)-C(38)-C(37)  | 119.9(6) |
| H(26A)-C(26)-H(26C) | 109.5    | C(33)-C(38)-H(38A) | 120.1    |
| H(26B)-C(26)-H(26C) | 109.5    | C(37)-C(38)-H(38A) | 120.1    |
| C(28)-C(27)-C(32)   | 118.5(5) | C(44)-C(39)-C(40)  | 116.8(5) |
| C(28)-C(27)-P(1)    | 120.4(4) | C(44)-C(39)-Si(1)  | 123.1(4) |
| C(32)-C(27)-P(1)    | 120.8(4) | C(40)-C(39)-Si(1)  | 120.0(4) |
| C(29)-C(28)-C(27)   | 120.4(6) | C(39)-C(40)-C(41)  | 121.1(6) |
| C(29)-C(28)-H(28A)  | 119.8    | C(39)-C(40)-H(40A) | 119.5    |
| C(27)-C(28)-H(28A)  | 119.8    | C(41)-C(40)-H(40A) | 119.5    |
| C(28)-C(29)-C(30)   | 120.9(6) | C(42)-C(41)-C(40)  | 121.2(6) |
| C(28)-C(29)-H(29A)  | 119.5    | C(42)-C(41)-H(41A) | 119.4    |
| C(30)-C(29)-H(29A)  | 119.5    | C(40)-C(41)-H(41A) | 119.4    |
| C(31)-C(30)-C(29)   | 118.4(6) | C(41)-C(42)-C(43)  | 118.6(5) |
| C(31)-C(30)-H(30A)  | 120.8    | C(41)-C(42)-H(42A) | 120.7    |

|                    |          |                    |           |
|--------------------|----------|--------------------|-----------|
| C(43)-C(42)-H(42A) | 120.7    | C(56)-C(51)-Si(1)  | 123.2(4)  |
| C(42)-C(43)-C(44)  | 120.1(5) | C(52)-C(51)-Si(1)  | 119.8(4)  |
| C(42)-C(43)-H(43A) | 119.9    | C(53)-C(52)-C(51)  | 122.1(5)  |
| C(44)-C(43)-H(43A) | 119.9    | C(53)-C(52)-H(52A) | 118.9     |
| C(39)-C(44)-C(43)  | 122.2(5) | C(51)-C(52)-H(52A) | 118.9     |
| C(39)-C(44)-H(44A) | 118.9    | C(52)-C(53)-C(54)  | 119.6(6)  |
| C(43)-C(44)-H(44A) | 118.9    | C(52)-C(53)-H(53A) | 120.2     |
| C(50)-C(45)-C(46)  | 116.6(5) | C(54)-C(53)-H(53A) | 120.2     |
| C(50)-C(45)-Si(1)  | 121.6(4) | C(55)-C(54)-C(53)  | 120.0(6)  |
| C(46)-C(45)-Si(1)  | 121.7(4) | C(55)-C(54)-H(54A) | 120.0     |
| C(47)-C(46)-C(45)  | 121.3(5) | C(53)-C(54)-H(54A) | 120.0     |
| C(47)-C(46)-H(46A) | 119.4    | C(54)-C(55)-C(56)  | 119.8(5)  |
| C(45)-C(46)-H(46A) | 119.4    | C(54)-C(55)-H(55A) | 120.1     |
| C(48)-C(47)-C(46)  | 120.2(5) | C(56)-C(55)-H(55A) | 120.1     |
| C(48)-C(47)-H(47A) | 119.9    | C(55)-C(56)-C(51)  | 121.5(5)  |
| C(46)-C(47)-H(47A) | 119.9    | C(55)-C(56)-H(56A) | 119.3     |
| C(49)-C(48)-C(47)  | 119.8(6) | C(51)-C(56)-H(56A) | 119.3     |
| C(49)-C(48)-H(48A) | 120.1    | C(58)-C(57)-C(62)  | 121.3(9)  |
| C(47)-C(48)-H(48A) | 120.1    | C(58)-C(57)-F(1)   | 121.0(13) |
| C(48)-C(49)-C(50)  | 120.3(6) | C(62)-C(57)-F(1)   | 117.7(13) |
| C(48)-C(49)-H(49A) | 119.8    | C(57)-C(58)-C(59)  | 119.1(9)  |
| C(50)-C(49)-H(49A) | 119.8    | C(60)-C(59)-C(58)  | 119.5(9)  |
| C(49)-C(50)-C(45)  | 121.8(5) | C(59)-C(60)-C(61)  | 119.4(9)  |
| C(49)-C(50)-H(50A) | 119.1    | C(62)-C(61)-C(60)  | 119.2(10) |
| C(45)-C(50)-H(50A) | 119.1    | C(57)-C(62)-C(61)  | 119.8(10) |
| C(56)-C(51)-C(52)  | 117.0(5) |                    |           |

---

Symmetry transformations used to generate equivalent atoms:

Table S13. Anisotropic displacement parameters ( $\text{\AA}^2 \times 10^3$ ) for **16**. The anisotropic displacement factor exponent takes the form:  $-2p^2[ h^2 a^* U^{11} + \dots + 2 h k a^* b^* U^{12} ]$

|       | U <sup>11</sup> | U <sup>22</sup> | U <sup>33</sup> | U <sup>23</sup> | U <sup>13</sup> | U <sup>12</sup> |
|-------|-----------------|-----------------|-----------------|-----------------|-----------------|-----------------|
| Ir(1) | 12(1)           | 14(1)           | 10(1)           | 0(1)            | 0(1)            | 2(1)            |
| Si(1) | 14(1)           | 20(1)           | 8(1)            | -1(1)           | 0(1)            | 2(1)            |
| P(1)  | 14(1)           | 16(1)           | 12(1)           | 2(1)            | 1(1)            | 5(1)            |
| P(2)  | 12(1)           | 15(1)           | 12(1)           | 1(1)            | -1(1)           | 2(1)            |
| N(1)  | 13(2)           | 15(2)           | 10(2)           | -2(2)           | -2(1)           | 1(2)            |
| C(1)  | 14(2)           | 18(3)           | 12(2)           | 0(2)            | 2(2)            | -1(2)           |
| C(2)  | 18(2)           | 13(3)           | 18(2)           | 0(2)            | 2(2)            | 2(2)            |
| C(3)  | 23(2)           | 21(3)           | 14(2)           | 2(2)            | 2(2)            | -3(2)           |
| C(4)  | 19(2)           | 24(3)           | 14(2)           | -4(2)           | 4(2)            | 1(2)            |
| C(5)  | 18(2)           | 20(3)           | 15(2)           | -5(2)           | 1(2)            | -1(2)           |
| C(6)  | 13(2)           | 20(3)           | 14(2)           | -3(2)           | -1(2)           | -1(2)           |
| C(7)  | 12(2)           | 14(3)           | 17(2)           | -2(2)           | 4(2)            | -3(2)           |
| C(8)  | 12(2)           | 15(3)           | 16(2)           | -2(2)           | 3(2)            | 2(2)            |
| C(9)  | 12(2)           | 15(3)           | 13(2)           | 4(2)            | -2(2)           | 1(2)            |
| C(10) | 20(2)           | 21(3)           | 13(2)           | 1(2)            | -3(2)           | 4(2)            |
| C(11) | 24(2)           | 19(3)           | 20(3)           | -2(2)           | -5(2)           | -5(2)           |
| C(12) | 16(2)           | 29(3)           | 28(3)           | 5(2)            | -3(2)           | -3(2)           |
| C(13) | 20(2)           | 26(3)           | 38(3)           | -6(3)           | 7(2)            | 0(2)            |
| C(14) | 20(2)           | 18(3)           | 20(2)           | -3(2)           | 4(2)            | 4(2)            |
| C(15) | 25(2)           | 17(3)           | 16(2)           | 1(2)            | 6(2)            | 8(2)            |
| C(16) | 42(3)           | 22(3)           | 14(2)           | -2(2)           | -1(2)           | 4(3)            |
| C(17) | 57(4)           | 35(4)           | 14(3)           | 3(3)            | -3(3)           | 13(3)           |
| C(18) | 53(4)           | 41(4)           | 27(3)           | 19(3)           | 19(3)           | 29(3)           |
| C(19) | 39(3)           | 51(5)           | 62(5)           | 34(4)           | 17(3)           | 8(3)            |
| C(20) | 26(3)           | 47(4)           | 42(4)           | 23(3)           | 7(3)            | 3(3)            |
| C(21) | 16(2)           | 18(3)           | 23(3)           | 3(2)            | -4(2)           | 3(2)            |
| C(22) | 15(2)           | 11(3)           | 32(3)           | -3(2)           | 2(2)            | -1(2)           |
| C(23) | 22(2)           | 20(3)           | 42(3)           | -4(3)           | -5(2)           | 0(2)            |
| C(24) | 15(2)           | 19(3)           | 23(3)           | -2(2)           | -1(2)           | -3(2)           |
| C(25) | 16(2)           | 21(3)           | 18(2)           | 1(2)            | -1(2)           | -1(2)           |
| C(26) | 48(3)           | 28(4)           | 13(2)           | 6(2)            | 6(2)            | 5(3)            |

|       |       |       |       |        |       |        |
|-------|-------|-------|-------|--------|-------|--------|
| C(27) | 21(2) | 18(3) | 17(2) | 1(2)   | -1(2) | 3(2)   |
| C(28) | 42(3) | 25(3) | 20(3) | 2(2)   | 11(2) | 8(3)   |
| C(29) | 68(4) | 18(3) | 22(3) | -3(2)  | 16(3) | 5(3)   |
| C(30) | 70(4) | 21(3) | 28(3) | 2(3)   | 14(3) | -7(3)  |
| C(31) | 31(3) | 29(3) | 22(3) | 2(2)   | -3(2) | -1(2)  |
| C(32) | 17(2) | 26(3) | 14(2) | 1(2)   | -1(2) | 6(2)   |
| C(33) | 19(2) | 33(3) | 10(2) | 1(2)   | 4(2)  | 6(2)   |
| C(34) | 26(3) | 40(4) | 24(3) | 9(3)   | 6(2)  | 13(3)  |
| C(35) | 25(3) | 62(5) | 30(3) | 17(3)  | 7(2)  | 19(3)  |
| C(36) | 14(2) | 87(6) | 31(3) | 15(4)  | -1(2) | 5(3)   |
| C(37) | 24(3) | 59(5) | 39(4) | 2(3)   | -1(3) | -5(3)  |
| C(38) | 23(3) | 38(4) | 21(3) | 0(3)   | 3(2)  | 2(2)   |
| C(39) | 23(2) | 14(3) | 17(2) | -2(2)  | 2(2)  | 5(2)   |
| C(40) | 40(3) | 35(4) | 16(3) | 0(3)   | -4(2) | -4(3)  |
| C(41) | 55(4) | 35(4) | 18(3) | 7(3)   | -3(3) | -6(3)  |
| C(42) | 51(3) | 26(3) | 13(3) | 2(2)   | -8(2) | 13(3)  |
| C(43) | 26(3) | 27(3) | 21(3) | -11(2) | -6(2) | 12(2)  |
| C(44) | 26(2) | 27(3) | 13(2) | -4(2)  | 2(2)  | 7(2)   |
| C(45) | 18(2) | 18(3) | 15(2) | 0(2)   | -2(2) | -1(2)  |
| C(46) | 20(2) | 32(3) | 17(2) | -5(2)  | 5(2)  | -2(2)  |
| C(47) | 26(3) | 34(4) | 31(3) | -5(3)  | 8(2)  | -7(2)  |
| C(48) | 24(3) | 43(4) | 38(3) | -16(3) | 8(2)  | -12(3) |
| C(49) | 27(3) | 35(4) | 30(3) | -18(3) | 2(2)  | -6(3)  |
| C(50) | 22(2) | 30(3) | 15(2) | -2(2)  | 3(2)  | 1(2)   |
| C(51) | 18(2) | 32(3) | 6(2)  | 3(2)   | 3(2)  | 1(2)   |
| C(52) | 29(3) | 27(3) | 17(3) | 1(2)   | 1(2)  | 7(2)   |
| C(53) | 34(3) | 37(4) | 26(3) | -5(3)  | 4(2)  | 11(3)  |
| C(54) | 47(3) | 38(4) | 23(3) | 2(3)   | 14(3) | 22(3)  |
| C(55) | 29(3) | 46(4) | 22(3) | 4(3)   | 7(2)  | 21(3)  |
| C(56) | 20(2) | 32(3) | 13(2) | 1(2)   | 6(2)  | 3(2)   |

---

For **18**: Crystals were grown out of a vapor diffusion of pentane into toluene at -30 °C. Badly disordered toluene was treated by Platon SQUEEZE (see cif for details).

Table S14. Crystal data and structure refinement for complex **18**.

|                                   |                                                      |                 |
|-----------------------------------|------------------------------------------------------|-----------------|
| Empirical formula                 | C <sub>56</sub> H <sub>48</sub> N <sub>2</sub> Rh Si |                 |
| Formula weight                    | 927.89                                               |                 |
| Temperature                       | 100(2) K                                             |                 |
| Wavelength                        | 1.54178 Å                                            |                 |
| Crystal system                    | Monoclinic                                           |                 |
| Space group                       | P 21/ c                                              |                 |
| Unit cell dimensions              | a = 13.1126(5) Å                                     | α = 90°.        |
|                                   | b = 15.3957(6) Å                                     | β = 98.327(2)°. |
|                                   | c = 25.2088(10) Å                                    | γ = 90°.        |
| Volume                            | 5035.4(3) Å <sup>3</sup>                             |                 |
| Z                                 | 4                                                    |                 |
| Density (calculated)              | 1.224 g/cm <sup>3</sup>                              |                 |
| Absorption coefficient            | 3.834 mm <sup>-1</sup>                               |                 |
| F(000)                            | 1920                                                 |                 |
| Crystal size                      | 0.18 x 0.12 x 0.10 mm <sup>3</sup>                   |                 |
| Crystal color/habit               | orange block                                         |                 |
| Theta range for data collection   | 3.37 to 68.08°.                                      |                 |
| Index ranges                      | -15 ≤ h ≤ 15, -18 ≤ k ≤ 18, -29 ≤ l ≤ 27             |                 |
| Reflections collected             | 25446                                                |                 |
| Independent reflections           | 8114 [R(int) = 0.0487]                               |                 |
| Completeness to theta = 68.08°    | 88.1 %                                               |                 |
| Absorption correction             | Analytical                                           |                 |
| Max. and min. transmission        | 0.7004 and 0.5453                                    |                 |
| Refinement method                 | Full-matrix least-squares on F <sup>2</sup>          |                 |
| Data / restraints / parameters    | 8114 / 0 / 555                                       |                 |
| Goodness-of-fit on F <sup>2</sup> | 0.969                                                |                 |
| Final R indices [I > 2σ(I)]       | R1 = 0.0348, wR2 = 0.0773                            |                 |
| R indices (all data)              | R1 = 0.0511, wR2 = 0.0823                            |                 |
| Largest diff. peak and hole       | 0.481 and -0.292 e.Å <sup>-3</sup>                   |                 |

Table S15. Atomic coordinates ( $\times 10^4$ ) and equivalent isotropic displacement parameters ( $\text{\AA}^2 \times 10^3$ ) for **18**.  $U(\text{eq})$  is defined as one third of the trace of the orthogonalized  $U_{ij}$  tensor.

|       | x        | y        | z       | $U(\text{eq})$ |
|-------|----------|----------|---------|----------------|
| Rh(1) | 6706(1)  | 947(1)   | 1552(1) | 18(1)          |
| Si(1) | 7613(1)  | 988(1)   | 830(1)  | 20(1)          |
| P(1)  | 7609(1)  | -110(1)  | 2054(1) | 20(1)          |
| P(2)  | 5549(1)  | 2056(1)  | 1323(1) | 19(1)          |
| N(1)  | 6675(2)  | 1496(2)  | 2298(1) | 18(1)          |
| C(1)  | 6861(2)  | 1288(2)  | 149(1)  | 24(1)          |
| C(2)  | 7333(3)  | 1760(2)  | -221(2) | 41(1)          |
| C(3)  | 6826(4)  | 1936(3)  | -728(2) | 51(1)          |
| C(4)  | 5834(3)  | 1646(2)  | -882(2) | 41(1)          |
| C(5)  | 5350(3)  | 1185(2)  | -525(1) | 36(1)          |
| C(6)  | 5862(2)  | 1001(2)  | -18(1)  | 30(1)          |
| C(7)  | 8334(2)  | -26(2)   | 677(1)  | 24(1)          |
| C(8)  | 9365(2)  | -191(2)  | 898(1)  | 29(1)          |
| C(9)  | 9856(3)  | -960(2)  | 782(2)  | 39(1)          |
| C(10) | 9336(3)  | -1575(2) | 447(2)  | 40(1)          |
| C(11) | 8323(3)  | -1424(2) | 220(2)  | 36(1)          |
| C(12) | 7841(3)  | -663(2)  | 331(1)  | 29(1)          |
| C(13) | 8620(2)  | 1875(2)  | 995(1)  | 25(1)          |
| C(14) | 9492(2)  | 1915(2)  | 736(1)  | 31(1)          |
| C(15) | 10192(3) | 2591(2)  | 829(2)  | 38(1)          |
| C(16) | 10047(3) | 3234(3)  | 1189(2) | 43(1)          |
| C(17) | 9207(3)  | 3203(3)  | 1458(2) | 41(1)          |
| C(18) | 8503(3)  | 2526(2)  | 1366(1) | 33(1)          |
| C(19) | 5872(2)  | 2780(2)  | 1892(1) | 20(1)          |
| C(20) | 6844(2)  | 973(2)   | 2757(1) | 22(1)          |
| C(21) | 7287(2)  | 149(2)   | 2713(1) | 21(1)          |
| C(22) | 7471(2)  | -405(2)  | 3152(1) | 26(1)          |
| C(23) | 7195(3)  | -194(2)  | 3646(1) | 28(1)          |
| C(24) | 7404(3)  | -786(2)  | 4125(2) | 42(1)          |
| C(25) | 6710(3)  | 605(2)   | 3680(1) | 29(1)          |

|       |          |          |         |       |
|-------|----------|----------|---------|-------|
| C(26) | 6541(2)  | 1175(2)  | 3255(1) | 24(1) |
| C(27) | 7237(2)  | -1236(2) | 1921(1) | 23(1) |
| C(28) | 7685(3)  | -1706(2) | 1543(2) | 34(1) |
| C(29) | 7360(3)  | -2545(2) | 1414(2) | 44(1) |
| C(30) | 6580(3)  | -2922(2) | 1657(2) | 43(1) |
| C(31) | 6134(3)  | -2454(2) | 2020(2) | 37(1) |
| C(32) | 6449(2)  | -1620(2) | 2153(1) | 28(1) |
| C(33) | 9012(2)  | -78(2)   | 2169(1) | 26(1) |
| C(34) | 9442(3)  | 756(2)   | 2208(1) | 36(1) |
| C(35) | 10508(3) | 859(3)   | 2304(2) | 50(1) |
| C(36) | 11139(3) | 137(3)   | 2350(2) | 54(1) |
| C(37) | 10718(3) | -682(3)  | 2310(2) | 53(1) |
| C(38) | 9656(3)  | -793(3)  | 2227(2) | 39(1) |
| C(39) | 6453(2)  | 2383(2)  | 2338(1) | 22(1) |
| C(40) | 6830(2)  | 2912(2)  | 2770(1) | 24(1) |
| C(41) | 6576(2)  | 3782(2)  | 2773(1) | 26(1) |
| C(42) | 5958(2)  | 4177(2)  | 2347(1) | 26(1) |
| C(43) | 5617(2)  | 3667(2)  | 1903(1) | 24(1) |
| C(44) | 5667(3)  | 5116(2)  | 2379(2) | 34(1) |
| C(45) | 4261(2)  | 1644(2)  | 1358(1) | 20(1) |
| C(46) | 3968(2)  | 840(2)   | 1129(1) | 23(1) |
| C(47) | 2970(2)  | 548(2)   | 1102(1) | 27(1) |
| C(48) | 2251(2)  | 1045(2)  | 1312(1) | 31(1) |
| C(49) | 2534(2)  | 1826(2)  | 1561(2) | 32(1) |
| C(50) | 3527(2)  | 2136(2)  | 1577(1) | 26(1) |
| C(51) | 5339(2)  | 2759(2)  | 736(1)  | 24(1) |
| C(52) | 4457(3)  | 2699(2)  | 364(1)  | 36(1) |
| C(53) | 4318(3)  | 3234(3)  | -81(2)  | 44(1) |
| C(54) | 5052(3)  | 3826(2)  | -167(2) | 42(1) |
| C(55) | 5936(3)  | 3881(3)  | 189(2)  | 53(1) |
| C(56) | 6091(3)  | 3357(2)  | 640(2)  | 45(1) |

---

Table S16. Bond lengths [Å] and angles [°] for **18**.

|             |           |              |          |
|-------------|-----------|--------------|----------|
| Rh(1)-N(1)  | 2.069(2)  | C(10)-C(11)  | 1.387(5) |
| Rh(1)-P(1)  | 2.2844(8) | C(10)-H(10A) | 0.9500   |
| Rh(1)-P(2)  | 2.3017(8) | C(11)-C(12)  | 1.379(4) |
| Rh(1)-Si(1) | 2.3148(8) | C(11)-H(11A) | 0.9500   |
| Rh(1)-H(1)  | 1.49(3)   | C(12)-H(12A) | 0.9500   |
| Si(1)-C(7)  | 1.893(3)  | C(13)-C(18)  | 1.394(4) |
| Si(1)-C(13) | 1.903(3)  | C(13)-C(14)  | 1.397(4) |
| Si(1)-C(1)  | 1.908(3)  | C(14)-C(15)  | 1.385(5) |
| Si(1)-H(1)  | 1.83(3)   | C(14)-H(14A) | 0.9500   |
| P(1)-C(21)  | 1.818(3)  | C(15)-C(16)  | 1.374(5) |
| P(1)-C(27)  | 1.819(3)  | C(15)-H(15A) | 0.9500   |
| P(1)-C(33)  | 1.821(3)  | C(16)-C(17)  | 1.375(5) |
| P(2)-C(19)  | 1.817(3)  | C(16)-H(16A) | 0.9500   |
| P(2)-C(45)  | 1.819(3)  | C(17)-C(18)  | 1.391(5) |
| P(2)-C(51)  | 1.820(3)  | C(17)-H(17A) | 0.9500   |
| N(1)-C(20)  | 1.401(4)  | C(18)-H(18A) | 0.9500   |
| N(1)-C(39)  | 1.402(4)  | C(19)-C(39)  | 1.405(4) |
| C(1)-C(6)   | 1.389(4)  | C(19)-C(43)  | 1.407(4) |
| C(1)-C(2)   | 1.395(5)  | C(20)-C(26)  | 1.404(4) |
| C(2)-C(3)   | 1.379(5)  | C(20)-C(21)  | 1.407(4) |
| C(2)-H(2A)  | 0.9500    | C(21)-C(22)  | 1.389(4) |
| C(3)-C(4)   | 1.377(6)  | C(22)-C(23)  | 1.384(4) |
| C(3)-H(3A)  | 0.9500    | C(22)-H(22A) | 0.9500   |
| C(4)-C(5)   | 1.371(5)  | C(23)-C(25)  | 1.394(4) |
| C(4)-H(4A)  | 0.9500    | C(23)-C(24)  | 1.507(5) |
| C(5)-C(6)   | 1.384(5)  | C(24)-H(24A) | 0.9800   |
| C(5)-H(5A)  | 0.9500    | C(24)-H(24B) | 0.9800   |
| C(6)-H(6A)  | 0.9500    | C(24)-H(24C) | 0.9800   |
| C(7)-C(12)  | 1.406(5)  | C(25)-C(26)  | 1.378(5) |
| C(7)-C(8)   | 1.409(4)  | C(25)-H(25A) | 0.9500   |
| C(8)-C(9)   | 1.399(5)  | C(26)-H(26A) | 0.9500   |
| C(8)-H(8A)  | 0.9500    | C(27)-C(32)  | 1.391(4) |
| C(9)-C(10)  | 1.382(5)  | C(27)-C(28)  | 1.393(4) |
| C(9)-H(9A)  | 0.9500    | C(28)-C(29)  | 1.384(5) |



|              |          |                   |            |
|--------------|----------|-------------------|------------|
| C(28)-H(28A) | 0.9500   | C(48)-C(49)       | 1.383(5)   |
| C(29)-C(30)  | 1.393(5) | C(48)-H(48A)      | 0.9500     |
| C(29)-H(29A) | 0.9500   | C(49)-C(50)       | 1.382(4)   |
| C(30)-C(31)  | 1.362(5) | C(49)-H(49A)      | 0.9500     |
| C(30)-H(30A) | 0.9500   | C(50)-H(50A)      | 0.9500     |
| C(31)-C(32)  | 1.376(5) | C(51)-C(52)       | 1.382(5)   |
| C(31)-H(31A) | 0.9500   | C(51)-C(56)       | 1.396(4)   |
| C(32)-H(32A) | 0.9500   | C(52)-C(53)       | 1.382(5)   |
| C(33)-C(38)  | 1.382(5) | C(52)-H(52A)      | 0.9500     |
| C(33)-C(34)  | 1.400(5) | C(53)-C(54)       | 1.365(5)   |
| C(34)-C(35)  | 1.392(5) | C(53)-H(53A)      | 0.9500     |
| C(34)-H(34A) | 0.9500   | C(54)-C(55)       | 1.361(6)   |
| C(35)-C(36)  | 1.382(6) | C(54)-H(54A)      | 0.9500     |
| C(35)-H(35A) | 0.9500   | C(55)-C(56)       | 1.384(5)   |
| C(36)-C(37)  | 1.375(6) | C(55)-H(55A)      | 0.9500     |
| C(36)-H(36A) | 0.9500   | C(56)-H(56A)      | 0.9500     |
| C(37)-C(38)  | 1.388(5) |                   |            |
| C(37)-H(37A) | 0.9500   | N(1)-Rh(1)-P(1)   | 82.22(7)   |
| C(38)-H(38A) | 0.9500   | N(1)-Rh(1)-P(2)   | 79.98(7)   |
| C(39)-C(40)  | 1.391(4) | P(1)-Rh(1)-P(2)   | 159.68(3)  |
| C(40)-C(41)  | 1.380(4) | N(1)-Rh(1)-Si(1)  | 141.65(7)  |
| C(40)-H(40A) | 0.9500   | P(1)-Rh(1)-Si(1)  | 99.82(3)   |
| C(41)-C(42)  | 1.389(5) | P(2)-Rh(1)-Si(1)  | 100.22(3)  |
| C(41)-H(41A) | 0.9500   | N(1)-Rh(1)-H(1)   | 166.1(11)  |
| C(42)-C(43)  | 1.386(5) | P(1)-Rh(1)-H(1)   | 94.1(12)   |
| C(42)-C(44)  | 1.500(4) | P(2)-Rh(1)-H(1)   | 100.9(12)  |
| C(43)-H(43A) | 0.9500   | Si(1)-Rh(1)-H(1)  | 52.2(11)   |
| C(44)-H(44A) | 0.9800   | C(7)-Si(1)-C(13)  | 106.55(14) |
| C(44)-H(44B) | 0.9800   | C(7)-Si(1)-C(1)   | 102.98(14) |
| C(44)-H(44C) | 0.9800   | C(13)-Si(1)-C(1)  | 105.95(14) |
| C(45)-C(46)  | 1.396(4) | C(7)-Si(1)-Rh(1)  | 117.79(10) |
| C(45)-C(50)  | 1.399(4) | C(13)-Si(1)-Rh(1) | 105.49(10) |
| C(46)-C(47)  | 1.376(4) | C(1)-Si(1)-Rh(1)  | 117.14(10) |
| C(46)-H(46A) | 0.9500   | C(7)-Si(1)-H(1)   | 95.3(9)    |
| C(47)-C(48)  | 1.378(4) | C(13)-Si(1)-H(1)  | 145.5(9)   |
| C(47)-H(47A) | 0.9500   | C(1)-Si(1)-H(1)   | 94.3(10)   |

|                  |            |                    |          |
|------------------|------------|--------------------|----------|
| Rh(1)-Si(1)-H(1) | 40.0(9)    | C(8)-C(7)-Si(1)    | 123.1(3) |
| C(21)-P(1)-C(27) | 106.56(14) | C(9)-C(8)-C(7)     | 120.9(3) |
| C(21)-P(1)-C(33) | 102.14(14) | C(9)-C(8)-H(8A)    | 119.5    |
| C(27)-P(1)-C(33) | 107.08(15) | C(7)-C(8)-H(8A)    | 119.5    |
| C(21)-P(1)-Rh(1) | 100.37(10) | C(10)-C(9)-C(8)    | 120.4(3) |
| C(27)-P(1)-Rh(1) | 118.27(11) | C(10)-C(9)-H(9A)   | 119.8    |
| C(33)-P(1)-Rh(1) | 119.99(11) | C(8)-C(9)-H(9A)    | 119.8    |
| C(19)-P(2)-C(45) | 106.63(13) | C(9)-C(10)-C(11)   | 119.8(3) |
| C(19)-P(2)-C(51) | 105.54(14) | C(9)-C(10)-H(10A)  | 120.1    |
| C(45)-P(2)-C(51) | 102.42(14) | C(11)-C(10)-H(10A) | 120.1    |
| C(19)-P(2)-Rh(1) | 100.78(10) | C(12)-C(11)-C(10)  | 119.8(4) |
| C(45)-P(2)-Rh(1) | 108.14(10) | C(12)-C(11)-H(11A) | 120.1    |
| C(51)-P(2)-Rh(1) | 131.42(10) | C(10)-C(11)-H(11A) | 120.1    |
| C(20)-N(1)-C(39) | 120.7(2)   | C(11)-C(12)-C(7)   | 122.4(3) |
| C(20)-N(1)-Rh(1) | 119.64(19) | C(11)-C(12)-H(12A) | 118.8    |
| C(39)-N(1)-Rh(1) | 119.7(2)   | C(7)-C(12)-H(12A)  | 118.8    |
| C(6)-C(1)-C(2)   | 116.9(3)   | C(18)-C(13)-C(14)  | 117.3(3) |
| C(6)-C(1)-Si(1)  | 122.6(2)   | C(18)-C(13)-Si(1)  | 121.4(2) |
| C(2)-C(1)-Si(1)  | 120.4(3)   | C(14)-C(13)-Si(1)  | 121.3(3) |
| C(3)-C(2)-C(1)   | 121.4(4)   | C(15)-C(14)-C(13)  | 121.5(3) |
| C(3)-C(2)-H(2A)  | 119.3      | C(15)-C(14)-H(14A) | 119.2    |
| C(1)-C(2)-H(2A)  | 119.3      | C(13)-C(14)-H(14A) | 119.2    |
| C(4)-C(3)-C(2)   | 120.4(4)   | C(16)-C(15)-C(14)  | 120.0(3) |
| C(4)-C(3)-H(3A)  | 119.8      | C(16)-C(15)-H(15A) | 120.0    |
| C(2)-C(3)-H(3A)  | 119.8      | C(14)-C(15)-H(15A) | 120.0    |
| C(5)-C(4)-C(3)   | 119.4(4)   | C(15)-C(16)-C(17)  | 120.0(3) |
| C(5)-C(4)-H(4A)  | 120.3      | C(15)-C(16)-H(16A) | 120.0    |
| C(3)-C(4)-H(4A)  | 120.3      | C(17)-C(16)-H(16A) | 120.0    |
| C(4)-C(5)-C(6)   | 120.1(4)   | C(16)-C(17)-C(18)  | 120.2(3) |
| C(4)-C(5)-H(5A)  | 119.9      | C(16)-C(17)-H(17A) | 119.9    |
| C(6)-C(5)-H(5A)  | 119.9      | C(18)-C(17)-H(17A) | 119.9    |
| C(5)-C(6)-C(1)   | 121.7(3)   | C(17)-C(18)-C(13)  | 121.1(3) |
| C(5)-C(6)-H(6A)  | 119.1      | C(17)-C(18)-H(18A) | 119.5    |
| C(1)-C(6)-H(6A)  | 119.1      | C(13)-C(18)-H(18A) | 119.5    |
| C(12)-C(7)-C(8)  | 116.7(3)   | C(39)-C(19)-C(43)  | 120.6(3) |
| C(12)-C(7)-Si(1) | 120.2(2)   | C(39)-C(19)-P(2)   | 113.8(2) |

|                     |          |                    |          |
|---------------------|----------|--------------------|----------|
| C(43)-C(19)-P(2)    | 125.6(2) | C(29)-C(30)-H(30A) | 120.3    |
| N(1)-C(20)-C(26)    | 125.4(3) | C(30)-C(31)-C(32)  | 121.0(3) |
| N(1)-C(20)-C(21)    | 118.1(3) | C(30)-C(31)-H(31A) | 119.5    |
| C(26)-C(20)-C(21)   | 116.3(3) | C(32)-C(31)-H(31A) | 119.5    |
| C(22)-C(21)-C(20)   | 121.1(3) | C(31)-C(32)-C(27)  | 120.6(3) |
| C(22)-C(21)-P(1)    | 123.9(2) | C(31)-C(32)-H(32A) | 119.7    |
| C(20)-C(21)-P(1)    | 115.0(2) | C(27)-C(32)-H(32A) | 119.7    |
| C(23)-C(22)-C(21)   | 122.3(3) | C(38)-C(33)-C(34)  | 119.3(3) |
| C(23)-C(22)-H(22A)  | 118.9    | C(38)-C(33)-P(1)   | 125.6(3) |
| C(21)-C(22)-H(22A)  | 118.9    | C(34)-C(33)-P(1)   | 115.1(2) |
| C(22)-C(23)-C(25)   | 116.4(3) | C(35)-C(34)-C(33)  | 120.0(4) |
| C(22)-C(23)-C(24)   | 122.6(3) | C(35)-C(34)-H(34A) | 120.0    |
| C(25)-C(23)-C(24)   | 121.0(3) | C(33)-C(34)-H(34A) | 120.0    |
| C(23)-C(24)-H(24A)  | 109.5    | C(36)-C(35)-C(34)  | 119.8(4) |
| C(23)-C(24)-H(24B)  | 109.5    | C(36)-C(35)-H(35A) | 120.1    |
| H(24A)-C(24)-H(24B) | 109.5    | C(34)-C(35)-H(35A) | 120.1    |
| C(23)-C(24)-H(24C)  | 109.5    | C(37)-C(36)-C(35)  | 120.2(4) |
| H(24A)-C(24)-H(24C) | 109.5    | C(37)-C(36)-H(36A) | 119.9    |
| H(24B)-C(24)-H(24C) | 109.5    | C(35)-C(36)-H(36A) | 119.9    |
| C(26)-C(25)-C(23)   | 122.4(3) | C(36)-C(37)-C(38)  | 120.5(4) |
| C(26)-C(25)-H(25A)  | 118.8    | C(36)-C(37)-H(37A) | 119.8    |
| C(23)-C(25)-H(25A)  | 118.8    | C(38)-C(37)-H(37A) | 119.8    |
| C(25)-C(26)-C(20)   | 121.3(3) | C(33)-C(38)-C(37)  | 120.1(4) |
| C(25)-C(26)-H(26A)  | 119.3    | C(33)-C(38)-H(38A) | 119.9    |
| C(20)-C(26)-H(26A)  | 119.3    | C(37)-C(38)-H(38A) | 119.9    |
| C(32)-C(27)-C(28)   | 118.7(3) | C(40)-C(39)-N(1)   | 124.9(3) |
| C(32)-C(27)-P(1)    | 121.6(2) | C(40)-C(39)-C(19)  | 117.5(3) |
| C(28)-C(27)-P(1)    | 119.5(2) | N(1)-C(39)-C(19)   | 117.4(3) |
| C(29)-C(28)-C(27)   | 120.0(3) | C(41)-C(40)-C(39)  | 120.9(3) |
| C(29)-C(28)-H(28A)  | 120.0    | C(41)-C(40)-H(40A) | 119.5    |
| C(27)-C(28)-H(28A)  | 120.0    | C(39)-C(40)-H(40A) | 119.5    |
| C(28)-C(29)-C(30)   | 120.4(3) | C(40)-C(41)-C(42)  | 122.3(3) |
| C(28)-C(29)-H(29A)  | 119.8    | C(40)-C(41)-H(41A) | 118.8    |
| C(30)-C(29)-H(29A)  | 119.8    | C(42)-C(41)-H(41A) | 118.8    |
| C(31)-C(30)-C(29)   | 119.3(3) | C(43)-C(42)-C(41)  | 117.3(3) |
| C(31)-C(30)-H(30A)  | 120.3    | C(43)-C(42)-C(44)  | 122.4(3) |

|                     |          |                    |          |
|---------------------|----------|--------------------|----------|
| C(41)-C(42)-C(44)   | 120.3(3) | C(50)-C(49)-H(49A) | 119.9    |
| C(42)-C(43)-C(19)   | 121.2(3) | C(48)-C(49)-H(49A) | 119.9    |
| C(42)-C(43)-H(43A)  | 119.4    | C(49)-C(50)-C(45)  | 120.0(3) |
| C(19)-C(43)-H(43A)  | 119.4    | C(49)-C(50)-H(50A) | 120.0    |
| C(42)-C(44)-H(44A)  | 109.5    | C(45)-C(50)-H(50A) | 120.0    |
| C(42)-C(44)-H(44B)  | 109.5    | C(52)-C(51)-C(56)  | 118.0(3) |
| H(44A)-C(44)-H(44B) | 109.5    | C(52)-C(51)-P(2)   | 121.7(2) |
| C(42)-C(44)-H(44C)  | 109.5    | C(56)-C(51)-P(2)   | 120.3(3) |
| H(44A)-C(44)-H(44C) | 109.5    | C(53)-C(52)-C(51)  | 120.6(3) |
| H(44B)-C(44)-H(44C) | 109.5    | C(53)-C(52)-H(52A) | 119.7    |
| C(46)-C(45)-C(50)   | 118.7(3) | C(51)-C(52)-H(52A) | 119.7    |
| C(46)-C(45)-P(2)    | 119.4(2) | C(54)-C(53)-C(52)  | 120.9(4) |
| C(50)-C(45)-P(2)    | 121.8(2) | C(54)-C(53)-H(53A) | 119.6    |
| C(47)-C(46)-C(45)   | 120.9(3) | C(52)-C(53)-H(53A) | 119.6    |
| C(47)-C(46)-H(46A)  | 119.6    | C(55)-C(54)-C(53)  | 119.3(4) |
| C(45)-C(46)-H(46A)  | 119.6    | C(55)-C(54)-H(54A) | 120.3    |
| C(46)-C(47)-C(48)   | 119.9(3) | C(53)-C(54)-H(54A) | 120.3    |
| C(46)-C(47)-H(47A)  | 120.1    | C(54)-C(55)-C(56)  | 121.0(4) |
| C(48)-C(47)-H(47A)  | 120.1    | C(54)-C(55)-H(55A) | 119.5    |
| C(47)-C(48)-C(49)   | 120.2(3) | C(56)-C(55)-H(55A) | 119.5    |
| C(47)-C(48)-H(48A)  | 119.9    | C(55)-C(56)-C(51)  | 120.2(4) |
| C(49)-C(48)-H(48A)  | 119.9    | C(55)-C(56)-H(56A) | 119.9    |
| C(50)-C(49)-C(48)   | 120.3(3) | C(51)-C(56)-H(56A) | 119.9    |

---

Symmetry transformations used to generate equivalent atoms:

Table S17. Anisotropic displacement parameters ( $\text{\AA}^2 \times 10^3$ ) for **18**. The anisotropic displacement factor exponent takes the form:  $-2p^2[ h^2 a^* U^{11} + \dots + 2 h k a^* b^* U^{12} ]$

|       | U <sup>11</sup> | U <sup>22</sup> | U <sup>33</sup> | U <sup>23</sup> | U <sup>13</sup> | U <sup>12</sup> |
|-------|-----------------|-----------------|-----------------|-----------------|-----------------|-----------------|
| Rh(1) | 16(1)           | 22(1)           | 16(1)           | 0(1)            | 5(1)            | 2(1)            |
| Si(1) | 20(1)           | 26(1)           | 16(1)           | -1(1)           | 5(1)            | 0(1)            |
| P(1)  | 18(1)           | 25(1)           | 17(1)           | 2(1)            | 6(1)            | 4(1)            |
| P(2)  | 18(1)           | 21(1)           | 19(1)           | 0(1)            | 4(1)            | 1(1)            |
| N(1)  | 18(1)           | 24(1)           | 14(1)           | -4(1)           | 4(1)            | 2(1)            |
| C(1)  | 29(2)           | 26(1)           | 18(2)           | -2(1)           | 2(1)            | 4(1)            |
| C(2)  | 53(2)           | 43(2)           | 25(2)           | 6(2)            | 0(2)            | -11(2)          |
| C(3)  | 75(3)           | 50(2)           | 27(2)           | 12(2)           | 1(2)            | -7(2)           |
| C(4)  | 61(3)           | 42(2)           | 18(2)           | 1(2)            | -3(2)           | 18(2)           |
| C(5)  | 34(2)           | 46(2)           | 26(2)           | -11(2)          | -4(2)           | 13(2)           |
| C(6)  | 30(2)           | 37(2)           | 23(2)           | -5(2)           | 4(1)            | 8(2)            |
| C(7)  | 25(2)           | 31(2)           | 17(2)           | 4(2)            | 10(1)           | 3(1)            |
| C(8)  | 25(2)           | 43(2)           | 22(2)           | 0(2)            | 8(1)            | 2(2)            |
| C(9)  | 30(2)           | 50(2)           | 38(2)           | 8(2)            | 13(2)           | 17(2)           |
| C(10) | 51(2)           | 43(2)           | 31(2)           | -1(2)           | 19(2)           | 19(2)           |
| C(11) | 38(2)           | 41(2)           | 32(2)           | -5(2)           | 9(2)            | 11(2)           |
| C(12) | 28(2)           | 36(2)           | 25(2)           | -1(2)           | 8(1)            | 4(2)            |
| C(13) | 22(2)           | 35(2)           | 19(2)           | 2(2)            | 4(1)            | -1(2)           |
| C(14) | 29(2)           | 37(2)           | 30(2)           | 0(2)            | 10(1)           | -2(2)           |
| C(15) | 30(2)           | 47(2)           | 40(2)           | -4(2)           | 15(2)           | -10(2)          |
| C(16) | 31(2)           | 53(2)           | 47(3)           | -13(2)          | 7(2)            | -18(2)          |
| C(17) | 39(2)           | 47(2)           | 38(2)           | -17(2)          | 7(2)            | -12(2)          |
| C(18) | 28(2)           | 42(2)           | 31(2)           | -7(2)           | 9(2)            | -4(2)           |
| C(19) | 17(1)           | 26(1)           | 18(2)           | -1(1)           | 6(1)            | 0(1)            |
| C(20) | 16(1)           | 30(2)           | 19(2)           | -4(2)           | 4(1)            | -4(1)           |
| C(21) | 17(1)           | 26(1)           | 22(2)           | -2(1)           | 6(1)            | 0(1)            |
| C(22) | 26(2)           | 29(2)           | 23(2)           | -3(2)           | 5(1)            | -1(1)           |
| C(23) | 35(2)           | 31(2)           | 20(2)           | 2(2)            | 8(1)            | -4(2)           |
| C(24) | 63(3)           | 40(2)           | 25(2)           | 8(2)            | 15(2)           | 4(2)            |
| C(25) | 32(2)           | 37(2)           | 20(2)           | -8(2)           | 11(1)           | -3(2)           |
| C(26) | 26(2)           | 26(2)           | 22(2)           | -5(1)           | 6(1)            | -3(1)           |

|       |       |       |       |        |       |        |
|-------|-------|-------|-------|--------|-------|--------|
| C(27) | 27(2) | 25(1) | 18(2) | 3(1)   | 4(1)  | 4(1)   |
| C(28) | 45(2) | 30(2) | 31(2) | 2(2)   | 16(2) | 0(2)   |
| C(29) | 66(3) | 34(2) | 35(2) | -4(2)  | 16(2) | 2(2)   |
| C(30) | 62(3) | 31(2) | 35(2) | -2(2)  | 8(2)  | -10(2) |
| C(31) | 39(2) | 41(2) | 30(2) | 4(2)   | 2(2)  | -11(2) |
| C(32) | 26(2) | 36(2) | 21(2) | 1(2)   | 1(1)  | 4(2)   |
| C(33) | 20(2) | 45(2) | 16(2) | 4(2)   | 7(1)  | 4(2)   |
| C(34) | 28(2) | 52(2) | 28(2) | 3(2)   | 6(1)  | 1(2)   |
| C(35) | 32(2) | 77(3) | 42(2) | -1(2)  | 5(2)  | -16(2) |
| C(36) | 18(2) | 98(4) | 48(3) | 16(3)  | 5(2)  | 4(2)   |
| C(37) | 32(2) | 84(3) | 43(3) | 20(2)  | 11(2) | 23(2)  |
| C(38) | 29(2) | 56(2) | 36(2) | 12(2)  | 11(2) | 15(2)  |
| C(39) | 16(1) | 28(2) | 23(2) | -4(2)  | 8(1)  | -2(1)  |
| C(40) | 20(2) | 30(2) | 23(2) | -2(2)  | 3(1)  | -4(1)  |
| C(41) | 20(2) | 30(2) | 28(2) | -10(2) | 6(1)  | -7(1)  |
| C(42) | 21(2) | 26(2) | 33(2) | -7(2)  | 9(1)  | -3(1)  |
| C(43) | 19(2) | 25(1) | 29(2) | -2(2)  | 6(1)  | -1(1)  |
| C(44) | 28(2) | 24(2) | 47(2) | -9(2)  | 1(2)  | 2(2)   |
| C(45) | 19(1) | 26(1) | 17(2) | 5(1)   | 5(1)  | 0(1)   |
| C(46) | 24(2) | 24(1) | 22(2) | 2(1)   | 4(1)  | 3(1)   |
| C(47) | 29(2) | 31(2) | 21(2) | 2(2)   | 0(1)  | -5(2)  |
| C(48) | 20(2) | 37(2) | 35(2) | 9(2)   | 2(1)  | -4(2)  |
| C(49) | 23(2) | 32(2) | 42(2) | -2(2)  | 10(2) | 1(2)   |
| C(50) | 25(2) | 29(2) | 24(2) | -2(2)  | 6(1)  | 3(1)   |
| C(51) | 29(2) | 23(1) | 22(2) | -2(1)  | 11(1) | 4(1)   |
| C(52) | 46(2) | 42(2) | 18(2) | 7(2)   | 2(2)  | -2(2)  |
| C(53) | 48(2) | 56(2) | 28(2) | 7(2)   | 1(2)  | 10(2)  |
| C(54) | 58(3) | 41(2) | 31(2) | 13(2)  | 15(2) | 19(2)  |
| C(55) | 58(3) | 50(2) | 53(3) | 28(2)  | 20(2) | -2(2)  |
| C(56) | 34(2) | 49(2) | 51(3) | 18(2)  | 5(2)  | -5(2)  |

---
